# Supplementary material
Source: publisher figshare collection journal article supplement (https://acs.figshare.com/ndownloader/files/5786301)

**Supporting Information for**

**Electrochemistry of Chalcogenoglycosides. Rational Design of Iterative**

**Glycosylation Based on Reactivity Control of Glycosyl Donors and Acceptors by**

**Oxidation Potentials**

*Shigeru Yamago,\* Koji Kokubo, Osamu Hara, Sadayoshi Masuda and Jun-ichi Yoshida\**

Department of Synthetic Chemistry and Biological Chemistry, Graduate School of Engineering,

Kyoto University, Sakyo-ku, Kyoto 606-8501, Japan

Contents.

1. Preparation of Selenoglycosides.
2. Preparation of Telluroglycosides.
3.  $^1\text{H}$  and  $^{13}\text{C}$  NMR spectra of selected compounds.

## 1. Preparation of Selenoglycosides.

**Typical procedures. Preparation of 1-Phenylseleno-2,3,4,6-tetra-*O*-benzoyl- $\beta$ -D-glucopyranoside (5a).** To a solution of diphenyl diselenide (0.57 g, 1.8 mmol) and 2,3,4,6-tetra-*O*-benzoyl- $\alpha$ -D-bromoglucopyranoside (1.98 g, 3.0 mmol) in a 20 mL of 1:1 mixture of CH<sub>3</sub>Cl and EtOH was added NaBH<sub>4</sub> (0.14 g, 3.6 mmol) at room temperature under nitrogen. Gas evolved, and the resulting solution was stirred for 2.5 h at room temperature. The volatile materials were removed under reduced pressure, and to this mixture was added water and ethyl acetate. The organic phase was separated and was washed with water, saturated aqueous sodium bicarbonate, 5% aqueous sodium hydroxide, and water, successively, and was dried over sodium sulfate. Solvent was removed under reduced pressure, and recrystallization of the crude mixture from EtOAc/hexane afforded the titled compound in 94% yield (2.06 g). <sup>1</sup>H NMR (300 MHz, CDCl<sub>3</sub>) 4.18 (ddd, *J* = 9.9, 5.2, 2.7 Hz, 1 H), 4.47 (dd, *J* = 12.0, 5.7 Hz, 1 H), 4.68 (dd, *J* = 12.3, 3.0 Hz, 1 H), 5.25 (d, *J* = 10.2 Hz, 1 H), 5.53 (t, *J* = 9.6 Hz, 1 H), 5.62 (t, *J* = 9.9 Hz, 1 H), 5.89 (t, *J* = 9.6 Hz, 1 H), 7.08-7.16 (m, 2 H), 7.20-7.64 (m, 15 H), 7.76-7.84 (m, 2 H), 7.86-7.93 (m, 2 H), 7.94-8.00 (m, 2 H), 8.00-8.08 (m, 2 H); <sup>13</sup>C NMR (75 MHz, CDCl<sub>3</sub>) 62.99 (CH<sub>2</sub>), 69.15 (CH), 71.16 (CH), 73.92 (CH), 77.26 (CH), 81.28 (CH), 127.70 (C), 128.27 (CH), 128.42 (CH), 128.65 (C), 128.71 (C), 128.98 (CH), 129.14 (C), 129.58 (C), 129.71 (CH), 129.82 (CH), 129.86 (CH), 133.22 (CH), 133.25 (CH), 133.37 (CH), 133.51 (CH), 135.21 (CH), 165.18 (C=O), 165.24 (C=O), 165.84 (C=O), 166.12 (C=O); Anal. Calcd for C<sub>40</sub>H<sub>32</sub>O<sub>9</sub>Se: C, 65.31; H, 4.38. Found: C, 65.18; H, 4.26.

**1-*p*-Methylphenylseleno-2,3,4,6-tetra-*O*-acetyl- $\beta$ -D-glucopyranoside (4b).** IR (KBr) 1744, 1256, 1227, 1046; <sup>1</sup>H NMR (300 MHz, CDCl<sub>3</sub>) 1.98 (s, 3 H), 2.01 (s, 3 H), 2.08 (s, 6 H), 2.36 (s, 3 H), 3.68 (ddd, *J* = 9.9, 3.9, 3.0 Hz, 1 H), 4.15-4.24 (m, 2 H), 4.83 (d, *J* = 10.2 Hz, 1 H), 4.97 (dd, *J* = 10.2, 9.3 Hz, 1 H), 5.01 (dd, *J* = 9.9, 9.6 Hz, 1 H), 5.18 (dd, *J* = 9.3 Hz, 1 H), 7.10-7.12 (m, 2 H), 7.48-7.51 (m, 2 H); <sup>13</sup>C NMR (75 MHz, CDCl<sub>3</sub>) 20.34 (CH<sub>3</sub>), 20.55 (CH<sub>3</sub>), 20.74 (CH<sub>3</sub>), 20.98 (CH<sub>3</sub>), 21.15 (CH<sub>3</sub>), 61.99 (CH<sub>2</sub>), 67.98 (CH), 70.65 (CH), 73.86 (CH), 76.83 (CH), 80.69 (CH),

122.90 (C), 129.77 (CH), 129.92 (CH), 135.69 (CH), 135.80 (CH), 138.84 (C), 139.38 (C=O), 169.49 (C=O), 170.29 (C=O), 170.67 (C=O) ; Anal. Calcd for C<sub>21</sub>H<sub>26</sub>O<sub>9</sub>Se: C, 50.31; H, 5.23. Found: C, 50.19; H, 5.19.

**1-*p*-Methoxyphenylseleno-2,3,4,6-tetra-*O*-acetyl- $\beta$ -D-glucopyranoside (4c).** IR (KBr) 2940, 1746 (br), 1227 (br), 1042 (br); <sup>1</sup>H NMR (300 MHz, CDCl<sub>3</sub>) 1.98 (s, 3 H), 2.01 (s, 3 H), 2.07 (s, 3 H), 2.09 (s, 3 H), 3.66 (dt, *J* = 10.2, 3.6 Hz, 1 H), 4.18 (d, *J* = 3.6 Hz, 2 H), 4.77 (d, *J* = 9.3 Hz, 1 H), 4.94 (dd, *J* = 9.9, 9.0 Hz, 1 H), 4.99 (d, *J* = 9.6 Hz, 1 H), 5.17 (t, *J* = 9.3 Hz, 1 H), 6.82-6.87 (m, 2 H), 7.50-7.56 (m, 2 H); <sup>13</sup>C NMR (75MHz, CDCl<sub>3</sub>) 20.39 (CH<sub>3</sub>, 2C), 20.62 (CH<sub>3</sub>, 2C), 55.12 (CH<sub>3</sub>), 61.94 (CH<sub>2</sub>), 68.06 (CH), 70.62 (CH), 73.81 (CH), 76.67 (CH), 80.39 (CH), 114.59 (CH, 2C), 116.20 (C), 137.97 (CH, 2C), 160.47 (C), 169.34 (C=O), 169.46 (C=O), 170.25 (C=O), 170.61 (C=O); Anal. Calcd for C<sub>21</sub>H<sub>26</sub>O<sub>10</sub>Se: C, 48.75; H, 5.06. Found: C, 48.50; H, 4.87.

**1-*p*-Methylphenylseleno-2,3,4,6-tetra-*O*-benzoyl- $\beta$ -D-glucopyranoside (5b).** IR (KBr) 1727, 1267, 1111, 1088, 1069, 1026, 710; <sup>1</sup>H NMR (300 MHz, CDCl<sub>3</sub>) 2.27 (s, 3 H), 4.15 (m, 1 H), 4.46 (dd, *J* = 12.0, 5.1 Hz, 1 H), 4.68 (dd, *J* = 12.0, 1.8 Hz, 1 H), 5.18 (d, *J* = 9.9 Hz, 1 H), 5.49 (t, *J* = 9.6 Hz, 1 H), 5.60 (t, *J* = 9.9 Hz, 1 H), 5.87 (t, *J* = 9.3 Hz, 1 H), 6.85 -6.95 (m, 2 H), 7.20-7.65 (m, 14 H), 7.75-7.85 (m, 2 H), 7.85-7.93 (m, 2 H), 7.93-8.00 (m, 2 H), 8.00-8.10 (m, 2 H); <sup>13</sup>C NMR (75 MHz, CDCl<sub>3</sub>) 21.11, 62.91, 69.14, 71.19, 73.99, 77.17, 80.99, 122.81, 128.17, 128.30, 128.59, 128.65, 129.11, 129.55, 129.61, 129.70, 129.76, 133.06, 133.12, 133.22, 133.38, 135.64, 138.52, 164.99, 165.06, 165.70, 165.94; Anal. Calcd for C<sub>41</sub>H<sub>34</sub>O<sub>9</sub>Se: C, 65.69; H, 4.57. Found: C, 65.61; H, 4.39.

**1-*p*-Methoxyphenylseleno-2,3,4,6-tetra-*O*-benzoyl- $\beta$ -D-glucopyranoside (5c).** IR (KBr) 1717 (br), 1267 (br), 1111, 1086, 1068, 1026, 710; <sup>1</sup>H NMR (300 MHz, CDCl<sub>3</sub>) 3.72 (s, 3 H), 4.14 (ddd, *J* = 12.6, 5.1, 2.7 Hz, 1 H), 4.45 (dd, *J* = 12.0, 2.4 Hz, 1 H), 4.69 (dd, *J* = 12.3, 2.7 Hz, 1 H), 5.13 (d, *J* = 10.2 Hz, 1 H), 5.46 (t, *J* = 9.6 Hz, 1 H), 5.58 (t, *J* = 9.6 Hz, 1 H), 5.87 (t, *J* = 9.6 Hz, 1 H), 6.64 (d, *J* = 10.2 Hz, 2 H), 7.22-7.62 (m, 14 H), 7.77-8.06 (m, 8 H); Anal. Calcd for C<sub>41</sub>H<sub>34</sub>O<sub>10</sub>Se: C, 64.32; H, 4.48. Found: C, 64.09; H, 4.56.

**1-*p*-Dimethylaminophenylseleno-2,3,4,6-tetra-*O*-benzoyl- $\beta$ -D-glucopyranoside (5d).** IR (KBr) 3065, 1717 (br), 1267 (br), 1111, 1086, 1068, 1026, 710;  $^1\text{H}$  NMR (300 MHz,  $\text{CDCl}_3$ ) 2.88 (s, 6 H), 4.12 (ddd,  $J = 9.9, 7.2, 2.7$  Hz, 1 H), 4.45 (dd,  $J = 12.3, 5.7$  Hz, 1 H), 4.69 (dd,  $J = 12.3, 3.0$  Hz, 1 H), 5.09 (d,  $J = 10.2$  Hz, 1 H), 5.47 (t,  $J = 10.2$  Hz, 1 H), 5.60 (t,  $J = 9.9$  Hz, 1 H), 5.86 (t,  $J = 9.6$  Hz, 1 H), 6.42 (d,  $J = 9.0$  Hz, 2 H), 7.20-7.60 (m, 14 H), 7.76-7.84 (m, 2 H), 7.86-7.92 (m, 2 H), 7.95-8.02 (m, 2 H), 8.03-8.08 (m, 2 H);  $^{13}\text{C}$  NMR (75MHz,  $\text{CDCl}_3$ )  $\delta$  39.93 ( $\text{CH}_3$ , 2C), 62.91 ( $\text{CH}_2$ ), 69.23 (CH), 71.19 (CH), 74.15 (CH), 77.05 (CH), 81.04 (CH), 110.73 (C), 112.45 (CH), 128.19 (CH), 128.35 (CH), 128.74 (C), 128.83 (C), 129.39 (C), 129.67 (CH), 129.71 (C), 129.76 (CH), 129.82 (CH), 129.85 (CH), 133.02 (CH), 133.13 (CH), 133.20 (CH), 133.38 (CH), 137.62 (CH), 150.69 (C), 165.09 (C=O), 165.21 (C=O), 165.84 (C=O), 166.07 (C=O); Anal. Calcd for  $\text{C}_{42}\text{H}_{37}\text{O}_9\text{NSe}$ : C, 64.78; H, 4.79; N, 1.80. Found: C, 64.64; H, 4.83; N, 1.80.

**1-*p*-Methylphenylseleno-2,3,4,6-tetra-*O*-benzyl- $\beta$ -D-glucopyranoside (6b).** IR (KBr) 1118, 1089, 1046, 1055, 1029, 743, 695;  $^1\text{H}$  NMR (300 MHz,  $\text{CDCl}_3$ ) 2.29 (s, 3 H), 3.45-3.80 (m, 6 H), 4.50-4.90 (m, 9 H), 6.97-6.99 (m, 2 H), 7.18-7.41 (m, 20 H), 7.56-7.59 (m, 2 H); Anal. Calcd for  $\text{C}_{41}\text{H}_{42}\text{O}_5\text{Se}$ : C, 70.87; H, 6.10. Found: C, 71.15; H, 6.13.

## 2. Preparation of Telluroglycosides.

**Typical procedures. Preparation of 1-phenyltelluro-2,3,4,6-tetra-*O*-benzoyl- $\beta$ -D-glucopyranoside (8a).** To a solution of diphenyl ditelluride (1.63 g, 4.0 mmol) and 2,3,4,6-tetra-*O*-benzoyl- $\alpha$ -D-bromoglucopyranoside (4.36 g, 6.6 mmol) in a 20 mL of 1:1 mixture of  $\text{CH}_3\text{Cl}$  and EtOH was added  $\text{NaBH}_4$  (0.35 g, 9.2 mmol) at room temperature under nitrogen. Gas evolved, and the resulting solution was stirred for 2.5 h at room temperature. Solvent was removed under reduced pressure, and  $\text{CHCl}_3$  (10 mL), water (3 mL), and triethanolamine (0.5 mL) were added to the crude mixture. The resulting mixture was stirred for 0.5 h, and the organic phase was separated. Water layer was extracted with  $\text{CHCl}_3$ , and the combined organic extracts were dried over magnesium sulfate and were concentrated under reduced pressure.

Recrystallization of the crude mixture from EtOAc/hexane afforded the titled compound in 80% yield (4.14 g, 5.3 mmol). Mp 166.2-167.8 °C; IR (KBr) 3063, 1736 (br), 1725 (br), 1718 (br), 1271 (br), 1263 (br), 111, 1091, 1066, 1026, 708; <sup>1</sup>H NMR (300 MHz, CDCl<sub>3</sub>) 4.10 (ddd, *J* = 9.9, 5.7, 2.7 Hz, 1 H), 4.45 (dd, *J* = 12.3, 5.4 Hz, 1 H), 4.65 (dd, *J* = 12.0 Hz, 2.7 Hz, 1 H), 5.53 (d, *J* = 10.2 Hz, 1 H), 5.57 (t, *J* = 9.0 Hz, 1 H), 5.63 (t, *J* = 9.3 Hz, 1 H), 5.86 (t, *J* = 9.3 Hz, 1 H), 7.02-7.10 (m, 2 H), 7.22-7.62 (m, 13 H), 7.76-7.86 (m, 4 H), 7.86-7.98 (m, 4 H), 7.98-8.06 (m, 2 H); <sup>13</sup>C NMR (75 MHz, CDCl<sub>3</sub>) 63.20 (CH<sub>2</sub>), 66.80 (CH), 69.39 (CH), 72.93 (CH), 73.78 (CH), 78.96 (CH), 111.72 (C), 128.34 (CH, 2 C), 128.48 (CH, 6 C), 128.71 (CH), 128.83 (C), 128.91 (C), 129.24 (CH, 2 C), 129.73 (C), 129.29 (CH, 2 C), 129.91 (CH, 4 C), 129.99 (CH, 2 C), 133.22 (CH), 133.28 (CH), 133.47 (CH), 133.52 (CH), 140.07 (CH, 2 C), 165.31 (C=O), 165.47 (C=O), 165.97 (C=O), 166.24 (C=O), one sp<sup>2</sup> quarternaly carbon signal could not be located owing to overlapping with other signals, Anal. Calcd for C<sub>40</sub>H<sub>32</sub>O<sub>9</sub>Te: C, 61.50; H, 4.03. Found: C, 61.26; H, 4.11.

**1-Phenyltelluro-2,3,4,6-tetra-*O* -acetyl-β-D-glucopyranoside (7a).** IR (KBr) 1745 (br), 1229, 1078, 733, 692. <sup>1</sup>H NMR (300 MHz, CDCl<sub>3</sub>) 1.98 (s, 3 H), 2.01 (s, 3 H), 2.04 (s, 3 H), 2.07 (s, 3 H), 3.63 (ddd, *J* = 9.9, 4.5, 3.0 Hz, 1 H), 4.12-4.22 (m, 2 H), 5.01-5.20 (m, 4 H), 7.23-7.40(m, 3 H), 7.82-7.85 (m, 2 H); <sup>13</sup>C NMR (75 MHz, CDCl<sub>3</sub>) 20.37 (CH<sub>3</sub>), 20.40 (CH<sub>3</sub>), 20.52 (CH<sub>3</sub>), 20.66 (CH<sub>3</sub>), 62.00 (CH<sub>2</sub>), 66.36 (CH), 68.10 (CH), 72.19 (CH), 73.42 (CH), 78.26 (CH), 111.34 (C), 128.74 (CH), 129.18 (CH, 2C), 140.02 (CH, 2C), 169.44 (C=O), 169.49 (C=O), 170.23 (C=O), 170.61 (C=O); Anal. Calcd for C<sub>20</sub>H<sub>24</sub>O<sub>9</sub>Te: C, 44.61; H, 4.50. Found: C, 44.54; H, 4.47.

**1-*p*-Methylphenyltelluro-2,3,4,6-tetra-*O*-acetyl-β-D-glucopyranoside (7b).** IR (KBr) 1745 (br), 1379, 1254, 1229 (br), 1042, 914, 804; <sup>1</sup>H NMR (300 MHz, CDCl<sub>3</sub>) 1.98 (s, 3 H), 2.01 (s, 3 H), 2.05 (s, 3 H), 2.07 (s, 3 H), 2.37 (s, 3 H), 3.62 (ddd, *J* = 9.9, 4.5, 3.3 Hz, 1 H), 4.15-4.23 (m, 2 H), 4.98-5.20 (m, 4 H), 7.07 (d, *J* = 7.8 Hz, 2 H), 7.72 (d, *J* = 7.8 Hz, 2 H); <sup>13</sup>C NMR (75 MHz, CDCl<sub>3</sub>) 20.46 (CH<sub>3</sub>), 20.49 (CH<sub>3</sub>), 20.60 (CH<sub>3</sub>), 20.77 (CH<sub>3</sub>), 21.21 (CH<sub>3</sub>), 62.12 (CH<sub>2</sub>), 66.32 (CH), 68.24 (CH), 72.29 (CH), 73.57 (CH), 78.32 (CH), 107.23 (C), 130.21 (CH, 2 C), 139.06 (C), 140.49 (CH, 2 C), 169.56 (C=O, 2 C), 170.35 (C=O), 170.72 (C=O); HRMS (FAB) *m/z*: Calcd for C<sub>21</sub>H<sub>26</sub>O<sub>9</sub>Te

(M - H)<sup>+</sup>, 551.0561; Found 551.0564; Anal. Calcd for C<sub>21</sub>H<sub>26</sub>O<sub>9</sub>Te: C, 45.65; H, 4.75. Found: C, 45.95; H, 4.75.

**1-*p*-Methylphenyltelluro-2,3,4,6-tetra-*O*-benzoyl- $\beta$ -D-glucopyranoside (8b).** mp 160-164 °C; IR (KBr) 3063, 1725 (br), 1269 (br), 1109, 1092, 1069, 1026, 708; <sup>1</sup>H NMR (300 MHz, CDCl<sub>3</sub>) 2.27 (s, 3 H), 4.07 (ddd, *J* = 9.9, 7.2, 3.0 Hz, 1 H), 4.44 (dd, *J* = 12.3, 5.7 Hz, 1 H), 4.66 (dd, *J* = 12.3, 2.7 Hz, 1 H), 5.46 (d, *J* = 10.5 Hz, 1 H), 5.55 (dd, *J* = 10.5, 8.7 Hz, 1 H), 5.62 (t, *J* = 9.6 Hz, 1 H), 5.84 (t, *J* = 9.3 Hz, 1 H), 6.82-6.90 (m, 2 H), 7.20-7.64 (m, 12 H), 7.66-7.72 (m, 2 H), 7.76-7.82 (m, 2 H), 7.86-7.92 (m, 2 H), 7.92-7.98 (m, 2 H), 8.00-8.06 (m, 2 H); <sup>13</sup>C NMR (75 MHz, CDCl<sub>3</sub>) 21.18 (CH<sub>3</sub>), 63.19 (CH<sub>2</sub>), 66.46 (CH), 69.41 (CH), 72.96 (CH), 73.86 (CH), 78.88 (CH), 107.49 (C), 128.33 (CH, 2 C), 128.47 (CH, C, 6 C), 128.88 (C), 128.95 (C), 129.33 (C), 129.8 (CH, 2 C), 129.91 (CH, 2 C), 129.95 (CH, 2 C), 130.00 (CH, 2 C), 130.19 (CH, 2 C), 133.19 (CH), 133.26 (CH), 133.40 (CH), 133.51 (CH), 138.88 (C), 140.48 (CH, 2 C), 165.33 (C=O), 165.43 (C=O), 166.00 (C=O), 166.25 (C=O), one sp<sup>2</sup> quarternary carbon signal could not be located owing to overlapping with other signals; HRMS (FAB) *m/z*: Calcd for C<sub>41</sub>H<sub>34</sub>O<sub>9</sub>Te (M + H)<sup>+</sup>, 801.1343; Found 801.1360; Anal. Calcd for C<sub>41</sub>H<sub>34</sub>O<sub>9</sub>Te: C, 61.69; H, 4.29. Found: C, 61.40; H, 4.16.

**1-*p*-Methoxyphenyltelluro-2,3,4,6-tetra-*O*-benzoyl- $\beta$ -D-glucopyranoside (8c).** IR (KBr) 2957, 1726 (br), 1275 (br), 1248, 1111, 1090, 1068, 1026, 710; <sup>1</sup>H NMR (300 MHz, CDCl<sub>3</sub>) 4.08 (ddd, *J* = 9.9, 7.2, 2.7 Hz, 1 H), 4.44 (dd, *J* = 12.0, 5.1 Hz, 1 H), 4.66 (dd, *J* = 9.3, 3.0 Hz, 1 H), 5.42 (d, *J* = 10.5 Hz, 1 H), 5.53 (t, *J* = 9.6 Hz, 1 H), 5.61 (t, *J* = 9.6 Hz, 1 H), 5.84 (t, *J* = 9.0 Hz, 1 H), 6.55-6.64 (m, 2 H), 7.20-7.66 (m, 12 H), 7.70-7.76 (m, 2 H), 7.76-7.84 (m, 2 H), 7.84-7.92 (m, 2 H), 7.92-8.00 (m, 2 H), 8.00-8.10 (m, 2 H); <sup>13</sup>C NMR (75 MHz, CDCl<sub>3</sub>) 54.94 (CH<sub>3</sub>), 63.02 (CH<sub>2</sub>), 66.22 (CH), 69.27 (CH), 72.81 (CH), 73.77 (CH), 78.75 (CH), 100.53 (C), 111.81 (C), 115.09 (CH), 128.28 (CH), 128.42 (CH), 128.77 (C), 128.85 (C), 129.24 (C), 129.73 (CH), 129.83 (CH), 129.86 (CH), 129.92 (CH), 133.17 (CH), 133.22 (CH), 133.37 (CH), 133.48 (CH), 142.37 (CH), 160.42 (C), 165.25 (C=O), 165.36 (C=O), 165.92 (C=O), 166.16 (C=O); Anal. Calcd for C<sub>41</sub>H<sub>34</sub>O<sub>10</sub>Te: C, 60.47; H, 4.21. Found: C, 60.25; H, 4.02.

**1-*p*-Dimethylaminophenyltelluro-2,3,4,6-tetra-*O*-benzoyl- $\beta$ -D-glucopyranoside (8d).** IR (KBr) 3065, 1739 (br), 1722 (br), 1715 (br), 1590, 1270 (br), 1111, 1096, 1069, 1026, 710;  $^1\text{H}$  NMR (300 MHz,  $\text{CDCl}_3$ ) 2.89 (s, 6 H), 4.07 (ddd,  $J = 9.9, 5.4, 2.7$  Hz, 1 H), 4.44 (dd,  $J = 12.0, 5.1$  Hz, 1 H), 4.66 (dd,  $J = 12.0, 2.7$  Hz, 1 H), 5.37 (d,  $J = 10.5$  Hz, 1 H), 5.53 (dd,  $J = 10.5, 9.3$  Hz, 1 H), 5.61 (t,  $J = 6.9$  Hz, 1 H), 5.82 (t,  $J = 9.3$  Hz, 1 H), 6.40 (d,  $J = 9.3$  Hz, 2 H), 7.21-7.70 (m, 14 H), 7.76-7.84 (m, 2 H), 7.86-7.92 (m, 2 H), 7.92-7.99 (m, 2 H), 8.02-8.08 (m, 2 H);  $^{13}\text{C}$  NMR (75 MHz,  $\text{CDCl}_3$ ) 39.88 ( $\text{CH}_3$ , 2C), 63.12 ( $\text{CH}_2$ ), 66.33 (CH), 69.38 (CH), 72.80 (CH), 73.86 (CH), 78.64 (CH), 94.72 (C), 113.00 (CH), 128.24 (CH), 128.37 (CH), 128.80 (C), 128.89 (C), 129.38 (C), 129.70 (CH), 129.74 (CH), 129.80 (CH), 129.88 (CH), 133.04 (CH), 133.14 (CH), 133.25 (CH), 133.40 (CH), 142.12 (CH), 150.69 (C), 165.25 (C=O), 165.28 (C=O), 165.90 (C=O), 166.15 (C=O); Anal. Calcd for  $\text{C}_{42}\text{H}_{37}\text{O}_9\text{NTe}$ : C, 60.97; H, 4.51; N, 1.69. Found: C, 60.46; H, 4.51; N, 1.64.

**1-*p*-Methylphenylthio-2,3,4-tri-*O*-benzyl- $\beta$ -D-glucopyranoside (9b).** IR (KBr) 3503, 1091, 1049, 1032, 735;  $^1\text{H}$  NMR (300 MHz,  $\text{CDCl}_3$ ) 2.34 (s, 3 H), 3.66 (ddd,  $J = 9.5, 4.8, 2.7$  Hz, 1 H), 3.46 (dd,  $J = 9.6, 8.7$  Hz, 1 H), 3.56 (t,  $J = 9.6$  Hz, 1 H), 3.64-3.76 (m, 2 H), 3.87 (dd,  $J = 12.0, 2.7$  Hz, 1 H), 4.64 (d,  $J = 9.6$  Hz, 2 H), 4.76 (d,  $J = 10.2$  Hz, 1 H), 4.82-4.95 (m, 4 H), 7.12 (d,  $J = 9.3$  Hz, 2 H), 7.24-7.45 (m, 17 H);  $^{13}\text{C}$  NMR (75 MHz,  $\text{CDCl}_3$ ) 21.13, 62.12, 75.12, 75.50, 75.82, 77.58, 79.20, 81.04, 86.54, 87.78, 127.76, 127.79, 127.91, 127.97, 128.03, 128.21, 128.44, 128.47, 128.52, 129.38, 129.79, 132.65, 137.79, 137.92, 138.05, 138.28; HRMS (FAB)  $m/z$ : Calcd for  $\text{C}_{34}\text{H}_{36}\text{O}_5\text{S}$  ( $\text{M} + \text{H}$ ) $^+$ , 557.2361; Found 557.2369.

**1-*p*-Methylphenylseleno-2,3,4-tri-*O*-benzyl- $\beta$ -D-glucopyranoside (10b).** IR (KBr) 3360, 1069, 695;  $^1\text{H}$  NMR (300 MHz,  $\text{CDCl}_3$ ) 1.98 (br t,  $J = 6.3$  Hz, 1 H, OH), 2.33 (s, 3 H), 3.34 (ddd,  $J = 9.6, 5.0, 2.6$  Hz, 1 H), 3.47 (dd,  $J = 9.6, 9.0$  Hz, 1 H), 3.53 (t,  $J = 9.0$  Hz, 1 H), 3.62 – 3.72 (m, 1 H), 3.69 (t,  $J = 9.0$  Hz, 1 H), 3.86 (br d,  $J = 11.7$  Hz, 1 H), 4.63 (d,  $J = 11.1$  Hz, 1 H), 4.76 (d,  $J = 10.2$  Hz, 1 H), 4.78 – 5.02 (m, 5 H), 7.09 (d,  $J = 7.8$  Hz, 2 H), 7.22 – 7.42 (m, 15 H), 7.52 (d,  $J = 7.8$  Hz, 2 H);  $^{13}\text{C}$  NMR (75 MHz,  $\text{CDCl}_3$ ) 21.13, 62.00, 75.07, 75.24, 75.74, 77.53, 80.26, 81.45, 82.68,

86.58, 124.05, 127.76, 127.88, 127.91, 127.96, 128.20, 128.38, 128.44, 129.87; HRMS (FAB)  $m/z$ : Calcd for  $C_{34}H_{36}O_5Se$  ( $M + H$ )<sup>+</sup>, 605.1806; Found 605.1791.

**1-*p*-Methylphenyltelluro-6-*O*-acetyl-2,3,4-tri-*O*-benzyl- $\beta$ -D-glucopyranoside (11).** IR (KBr) 1744, 1242, 1130, 1089, 1067, 695; <sup>1</sup>H NMR (300 MHz, CDCl<sub>3</sub>) 2.05 (s, 3H), 2.35 (s, 3H), 3.74-3.54 (m, 3H), 3.68 (t,  $J = 8.7$  Hz, 1H), 4.19 (dd,  $J = 11.7, 4.5$  Hz, 1H), 4.36 (dd,  $J = 12.0, 1.8$  Hz, 1H), 4.56 (d,  $J = 11.1$  Hz, 1H), 4.75-4.93 (m, 5H), 5.05 (d,  $J = 10.2$  Hz, 1H), 7.01-7.04 (m, 2H), 7.25-7.38 (m, 15H), 7.72-7.75 (m, 2H); <sup>13</sup>C NMR (75 MHz, CDCl<sub>3</sub>) 20.71 (CH<sub>3</sub>), 21.13 (CH<sub>3</sub>), 63.08 (CH<sub>2</sub>), 68.00 (CH), 74.97 (CH<sub>2</sub>), 75.06 (CH<sub>2</sub>), 75.69 (CH<sub>2</sub>), 77.50 (CH), 79.22 (CH), 82.02 (CH), 86.91 (CH), 107.61 (C), 127.84 (CH), 127.99 (CH), 128.06 (CH), 128.18 (CH), 128.36 (CH), 128.48 (CH), 128.56 (CH), 130.05 (CH), 137.64 (C), 137.79 (C), 138.15 (C), 138.41 (C), 140.02 (CH), 170.75 (C=O); HRMS (FAB)  $m/z$ : Calcd for  $C_{36}H_{38}O_6Te$  ( $M + H$ )<sup>+</sup>, 697.1809; Found 697.1810.

### 3. $^1\text{H}$ and $^{13}\text{C}$ NMR spectra of selected compounds.

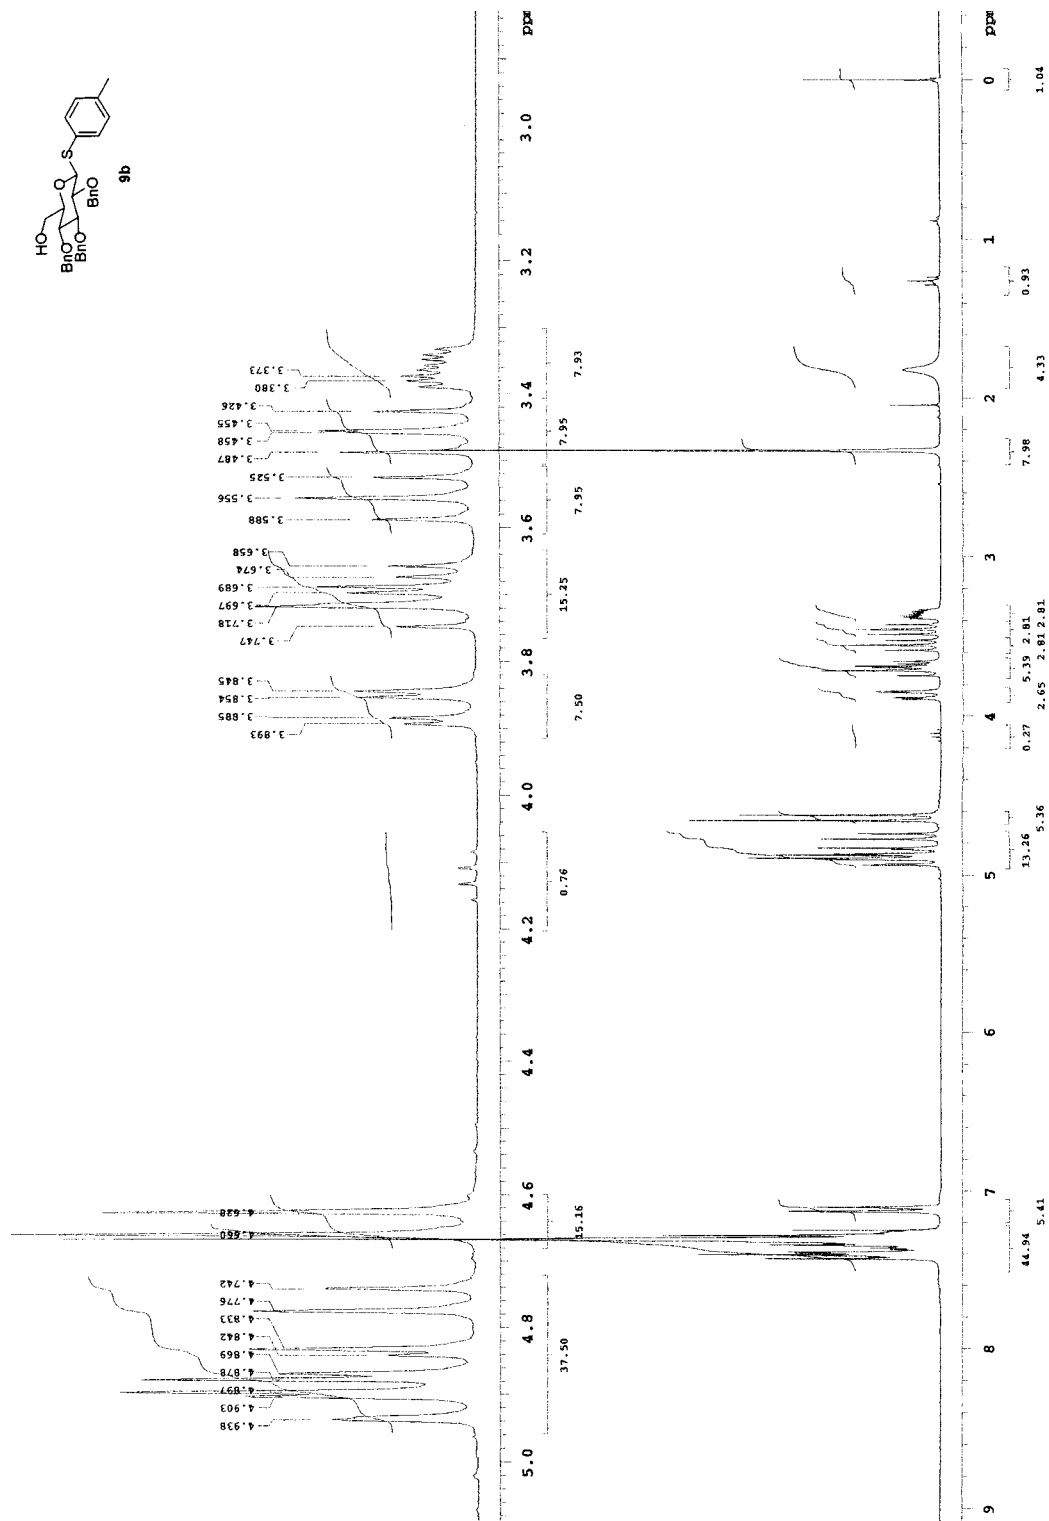

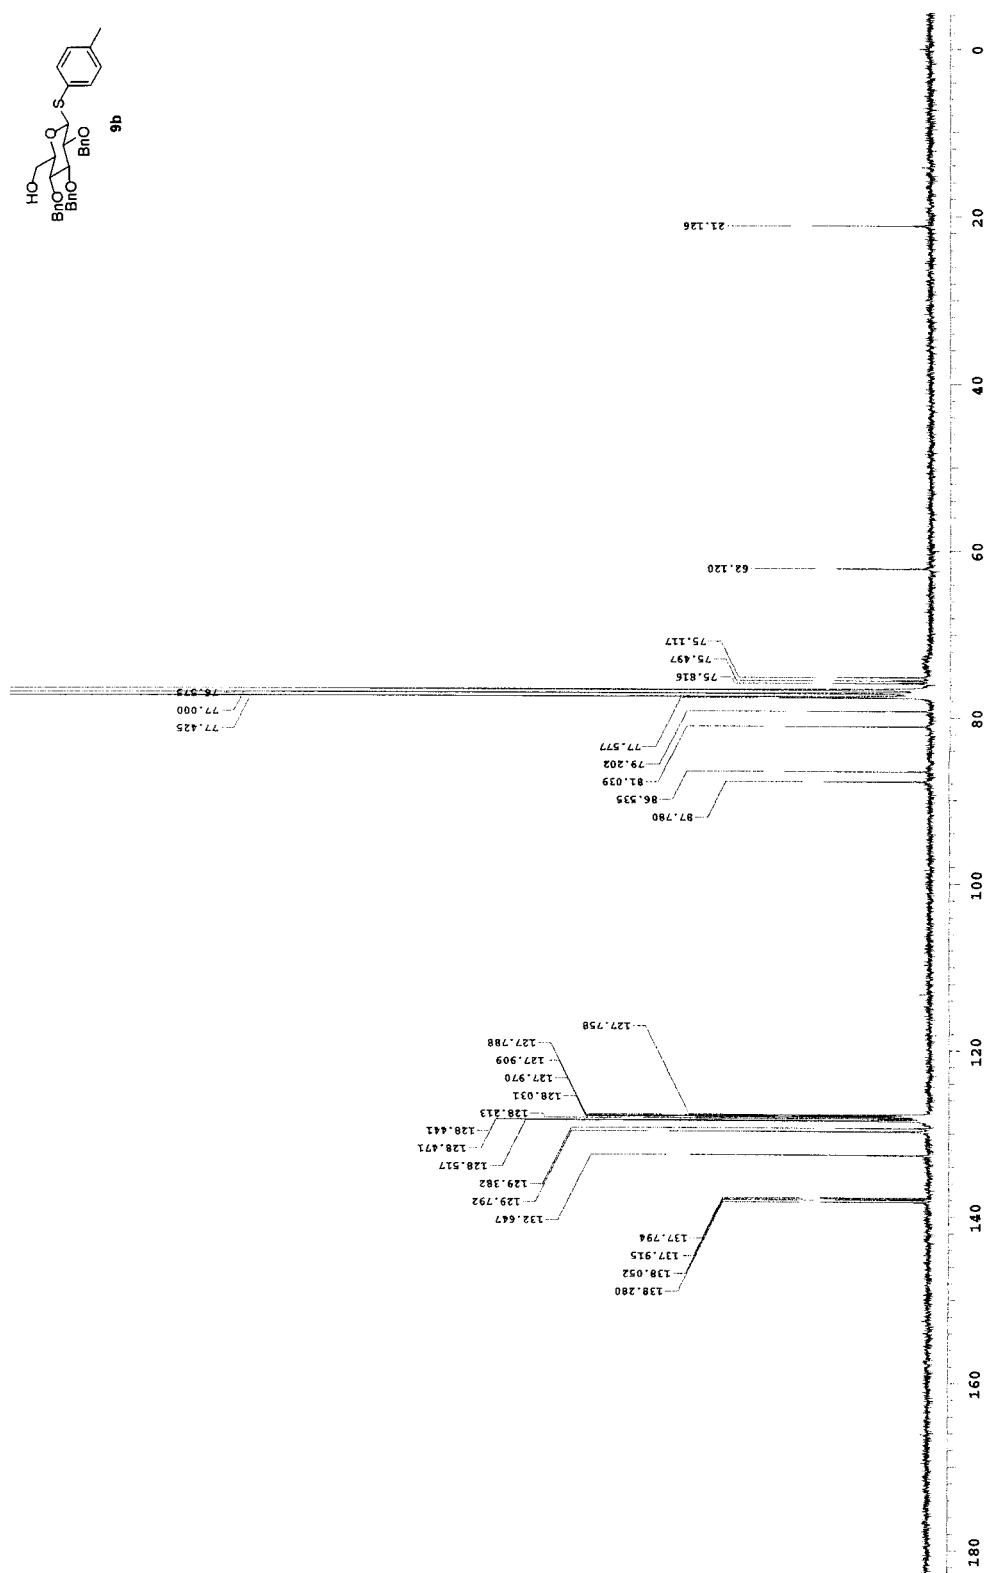

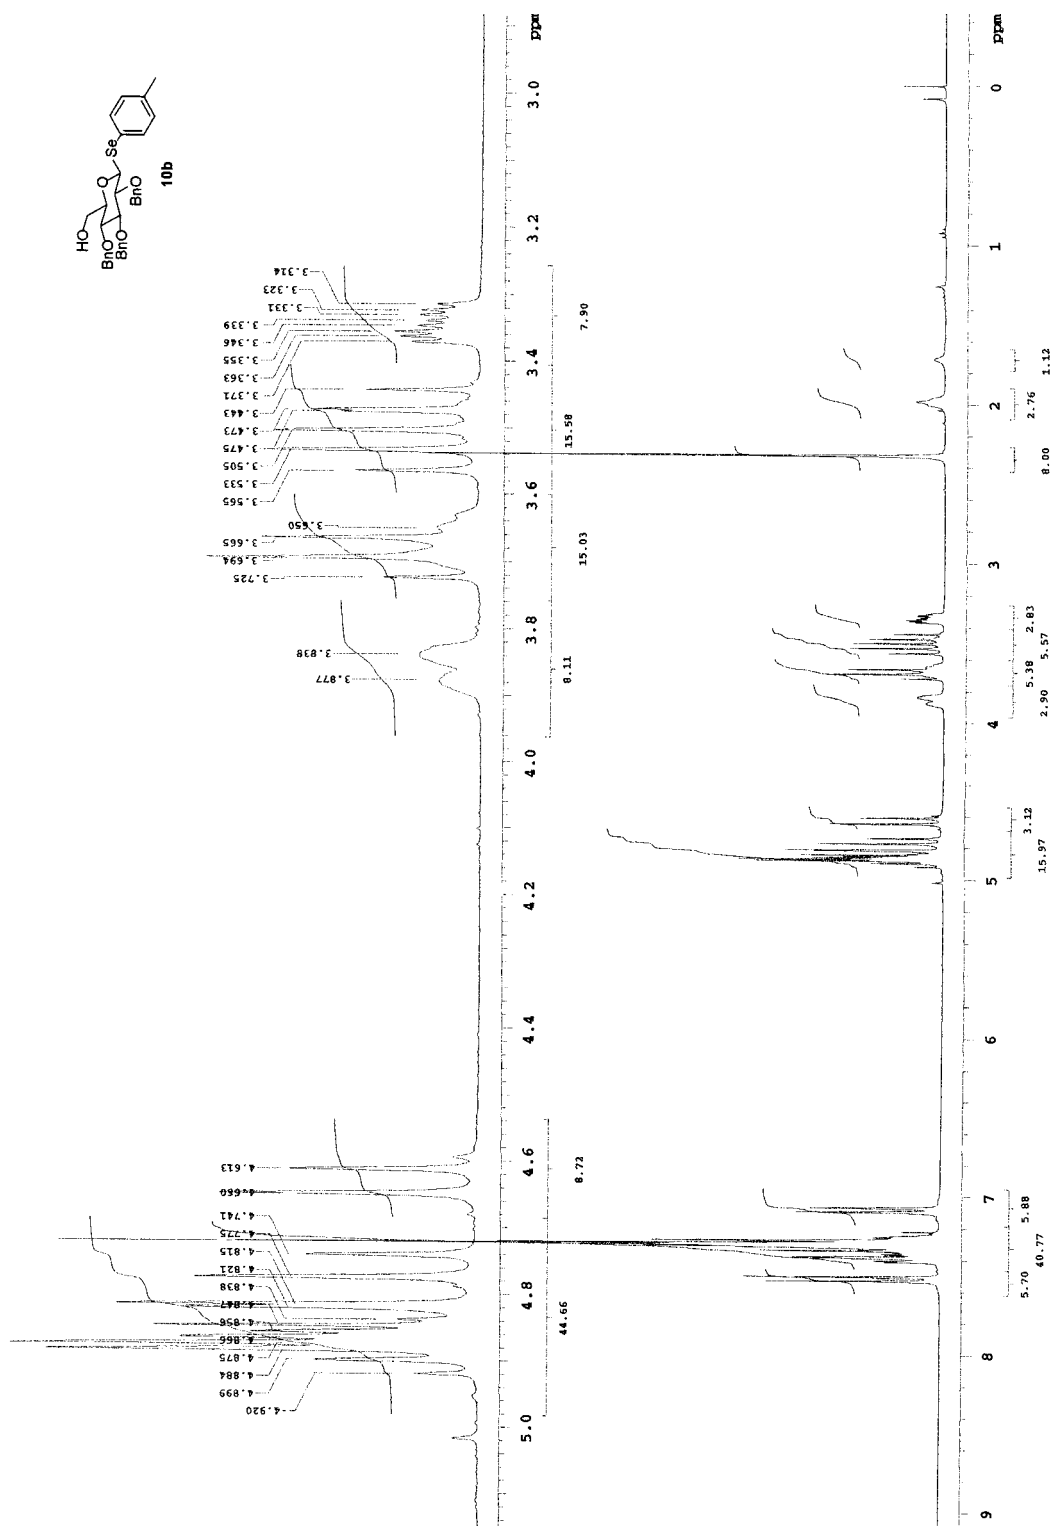

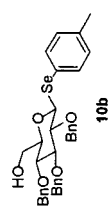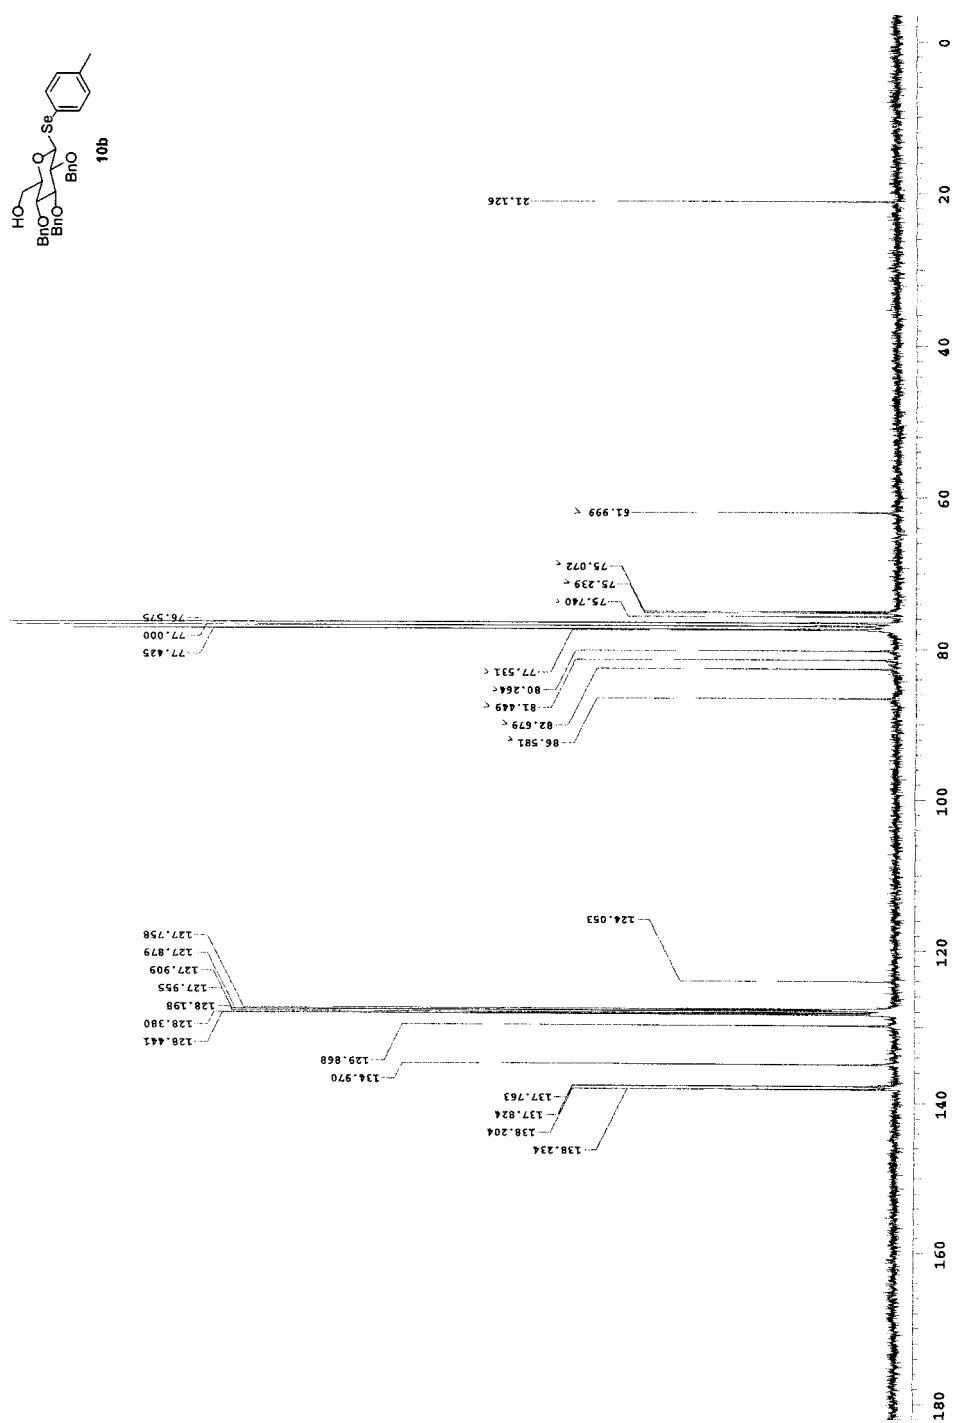

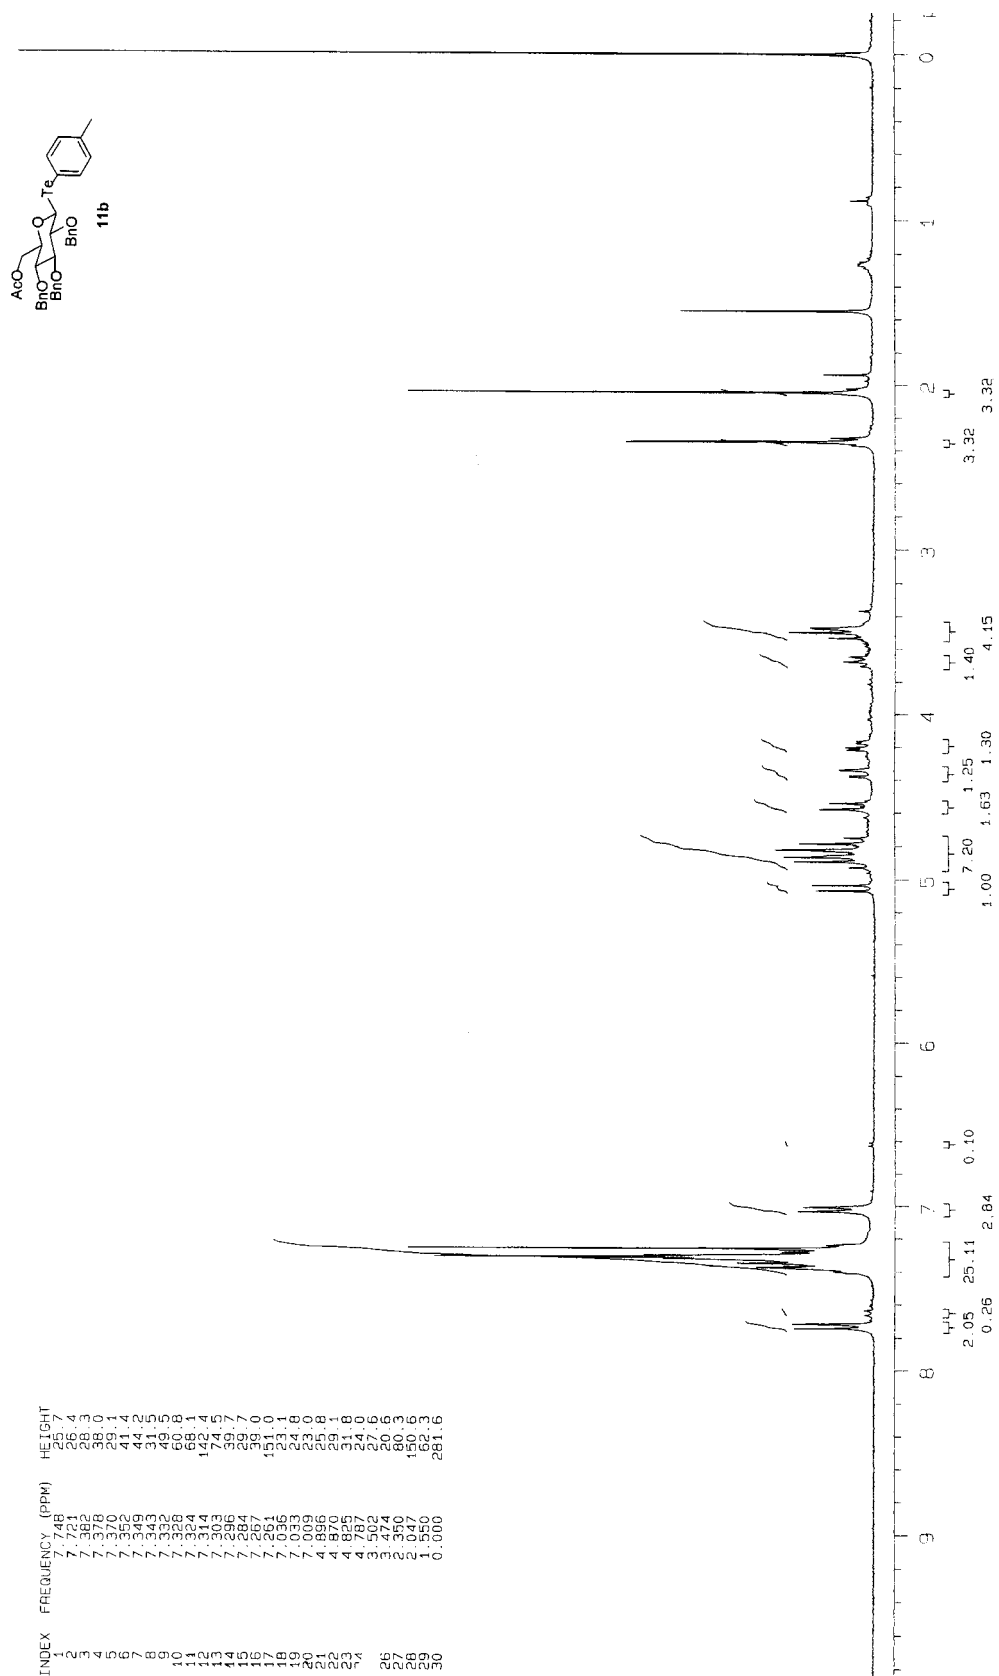

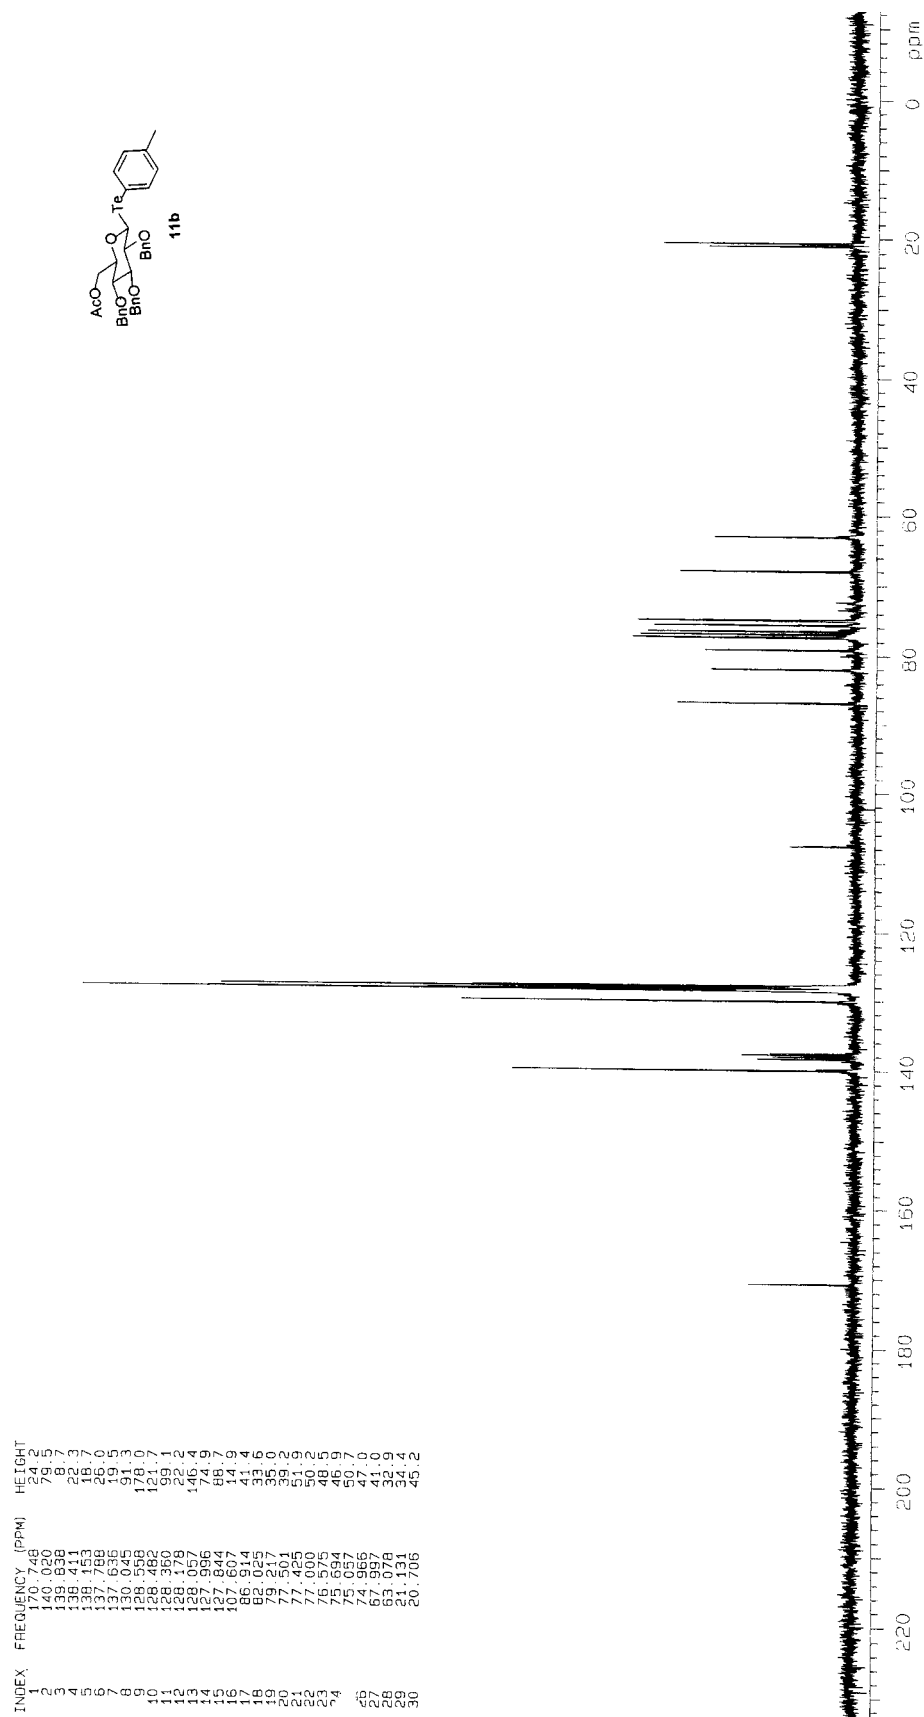

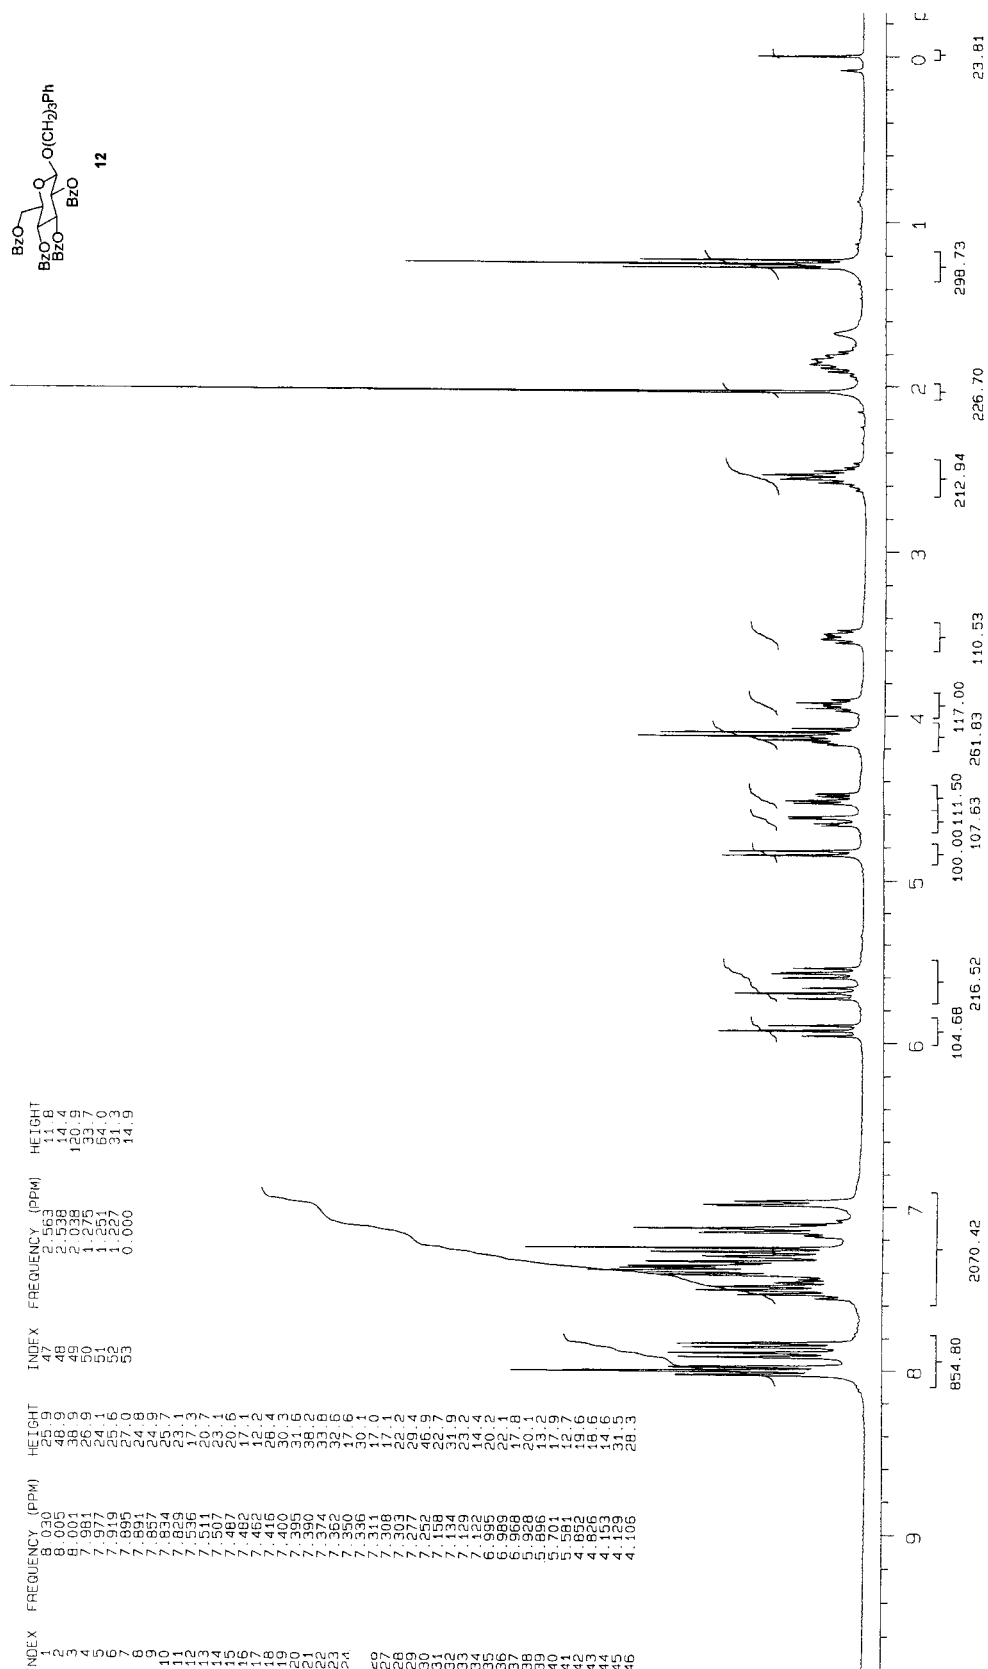

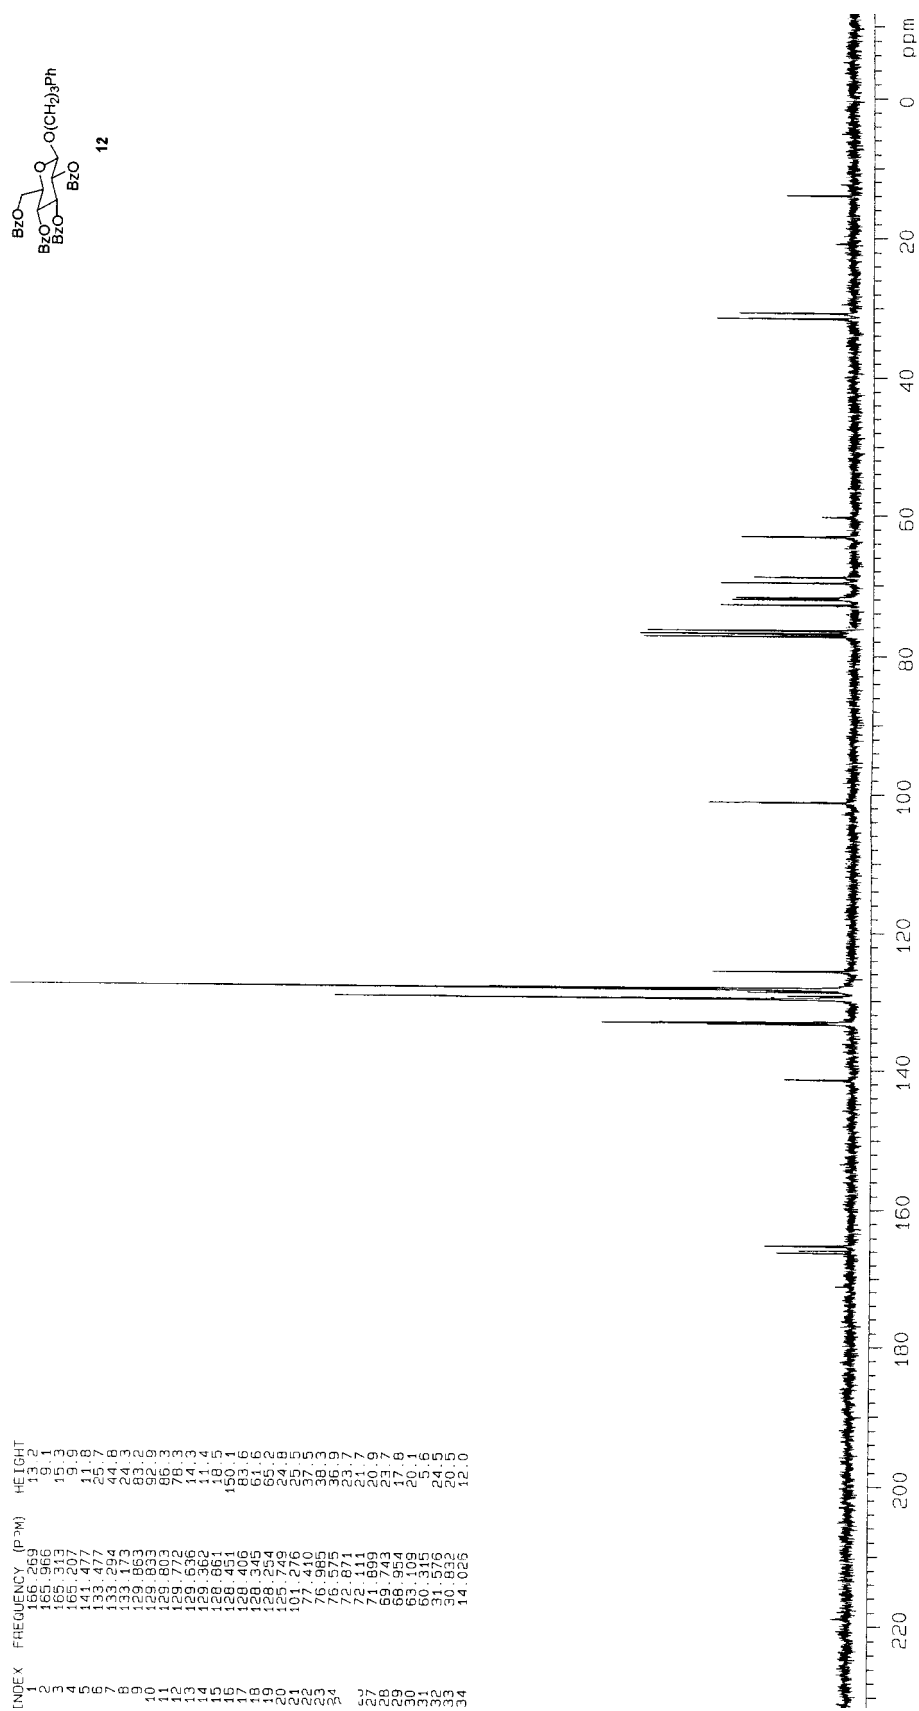



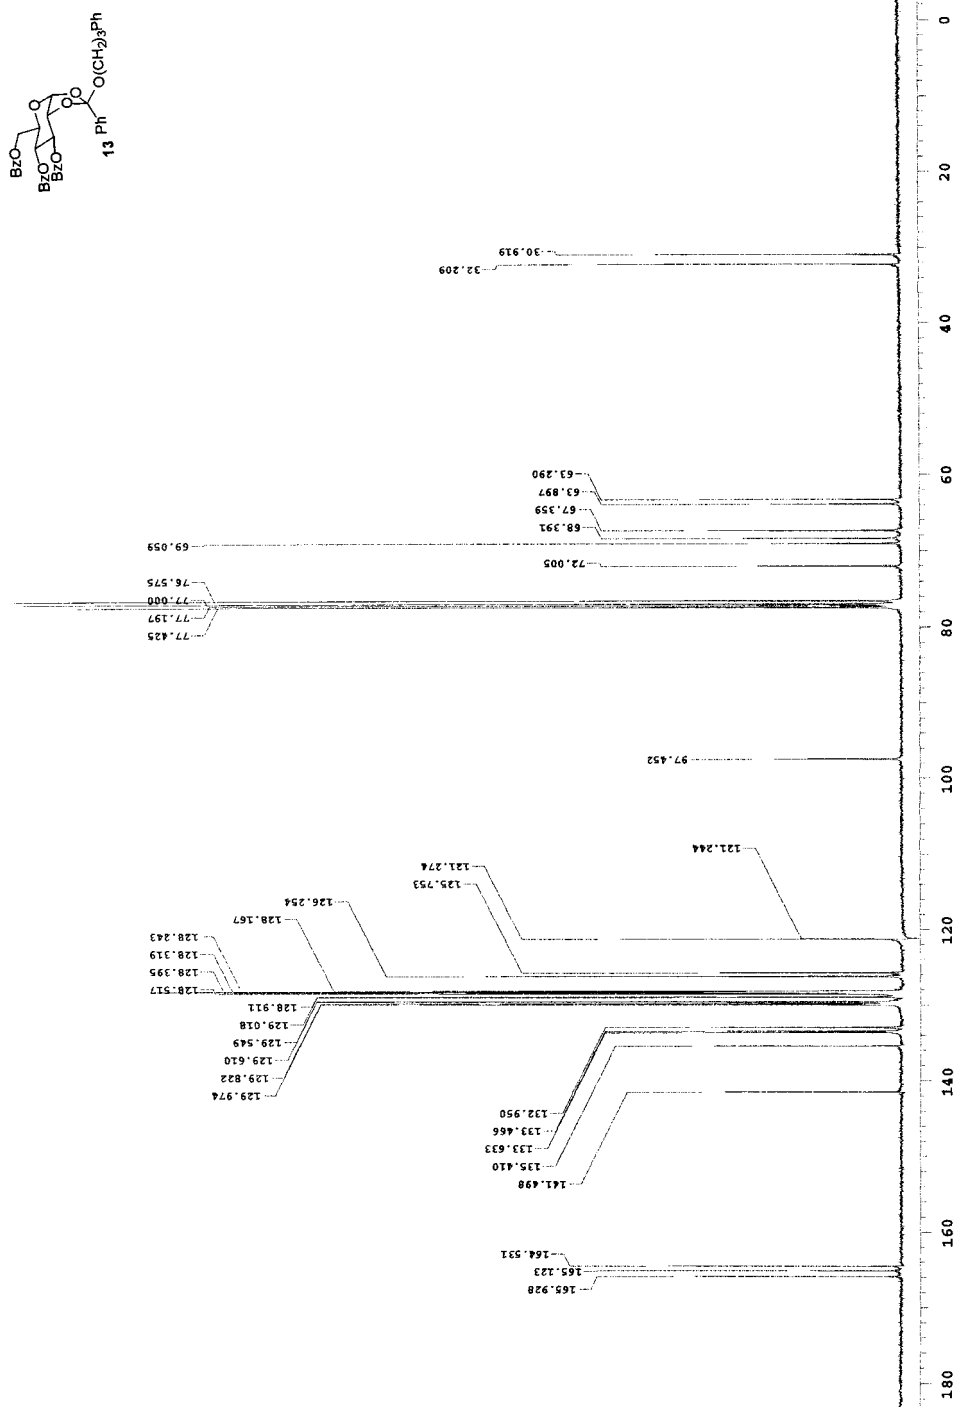

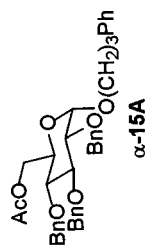

COMNT :  
 EXMOD : SINGL  
 IRMOD : NON  
 POINT : 32768  
 FREQU : 599.80 Hz  
 SCANS : 16  
 DUMMY : 2  
 ACQTM : 5.4624 sec  
 PD : 3.0000 sec  
 RGAIN : 22  
 PW1 : 4.44 usec

OBNUC :  $^1\text{H}$   
 OBFRQ : 399.65 MHz  
 OBSET : 134870.00 Hz  
 IRNUC :  $^1\text{H}$   
 IRFRQ : 399.65 MHz  
 IRSET : 134500.00 Hz  
 IRATN : 511  
 IRAPW : 50.0 usec  
 IRBP1 : 26  
 IRBP2 : 6  
 IRBNS : 0

ADBIT : 16  
 CTEMP : 30.0 c  
 CSPED : 12 Hz  
 SLVNT : CDCL<sub>3</sub>

RESOL : 0.18 Hz  
 BF : 0.09 Hz  
 T1 : 0.00 %  
 T2 : 0.00 %  
 T3 : 90.00 %  
 T4 : 100.00 %  
 REFVL : 0.00 ppm  
 XE : 3997.67 Hz  
 XS : 481.75 Hz  
 operator

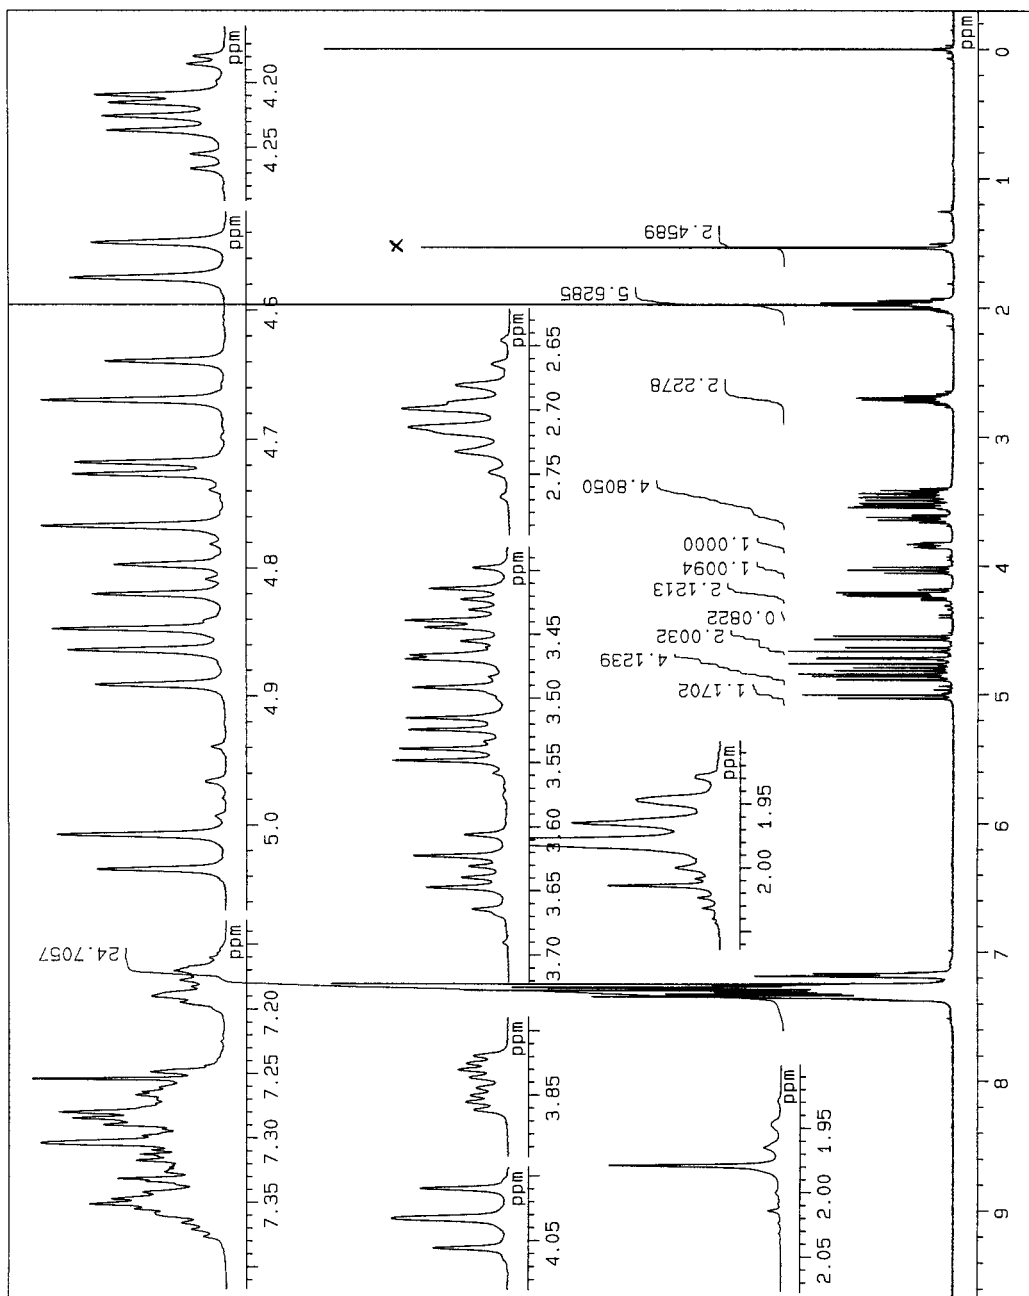

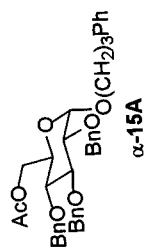

COMNT :  
 EXMOD : SINGL  
 IRMOD : BCM  
 POINT : 32768  
 FREQ : 25000.00 Hz  
 SCANS : 64000  
 DUMY : 16  
 ACQTM : 1.3107 sec  
 PD : 1.2000 sec  
 RGAIN : 27  
 PW1 : 4.22 usec

OBNUC :  $^{13}\text{C}$   
 OBFRQ : 100.40 MHz  
 OBSSET : 137395.00 Hz

IRNUC :  $^1\text{H}$   
 IRFRQ : 399.65 MHz  
 IRSET : 134500.00 Hz  
 IRATN : 511  
 IRRPW : 50.0 usec  
 IRBP1 : 26  
 IRBP2 : 6  
 IRRNS : 0

ADBIT : 16  
 CTEMP : 30.0 C  
 CSPED : 12 Hz  
 SLVNT : CDCL<sub>3</sub>

RESOL : 0.76 Hz  
 BF : 0.38 Hz  
 T1 : 0.00 %  
 T2 : 0.00 %  
 T3 : 90.00 %  
 T4 : 100.00 %  
 REFVL : 0.00 ppm  
 XE : 20104.22 Hz  
 XS : 2257.16 Hz  
 operator

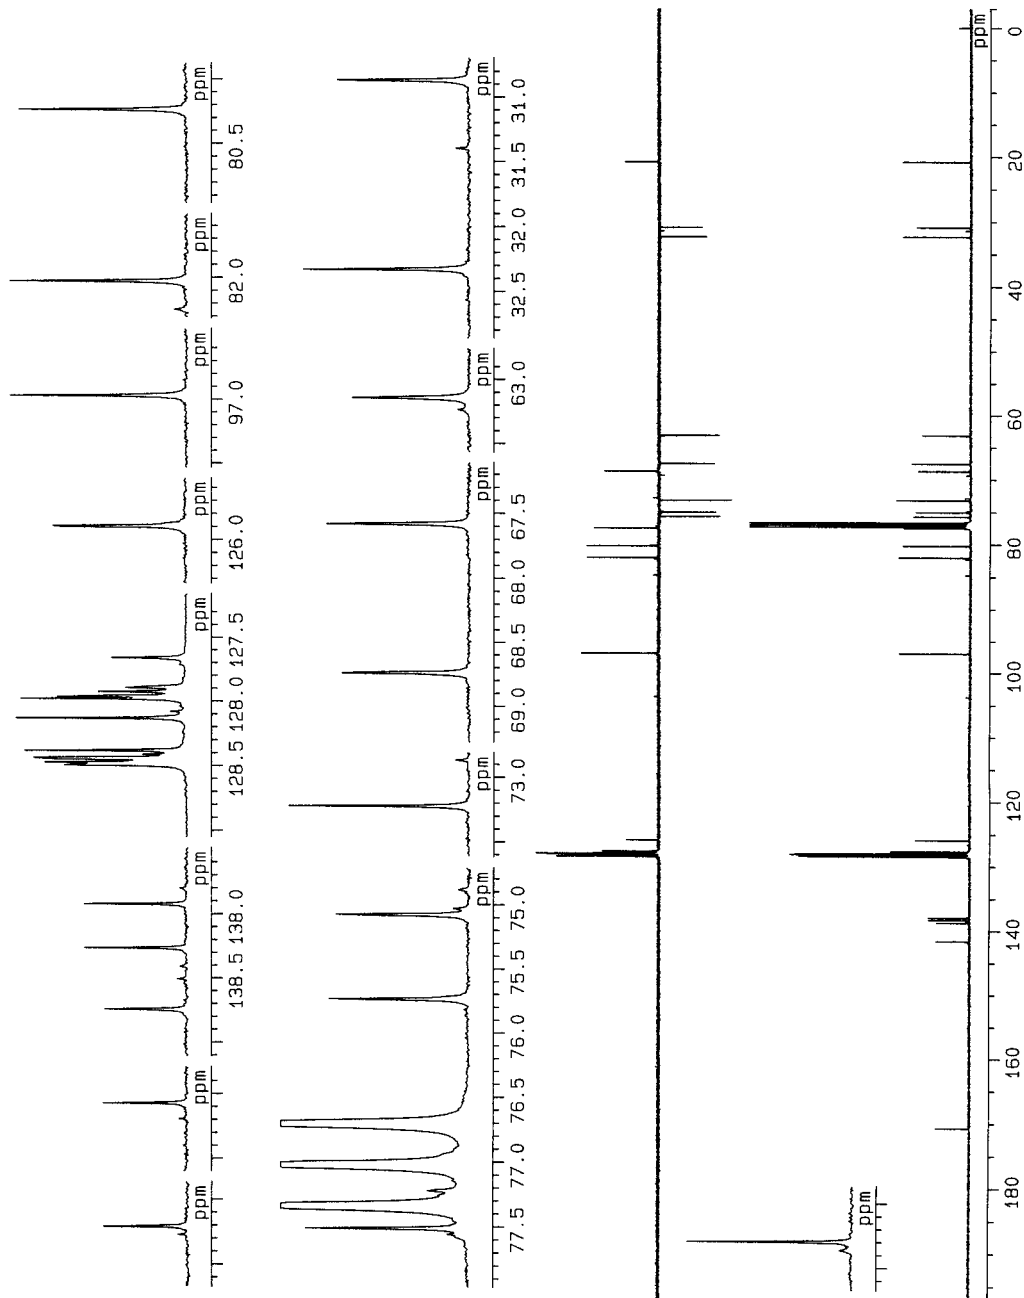

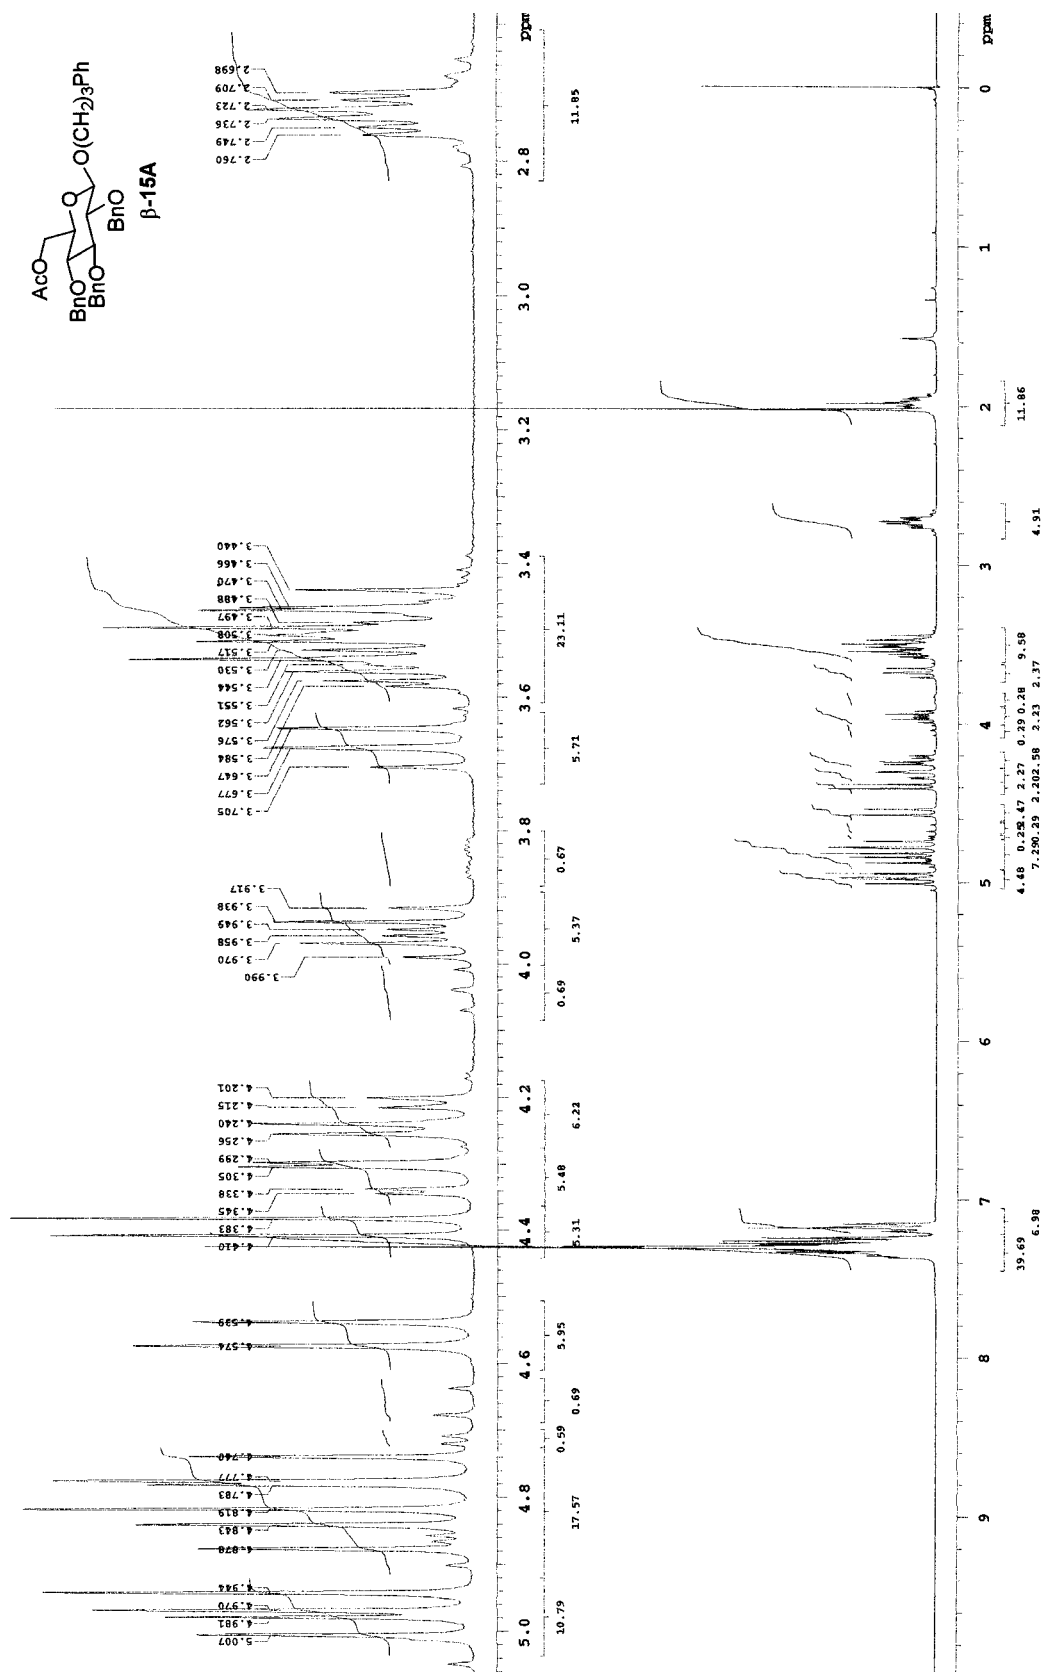

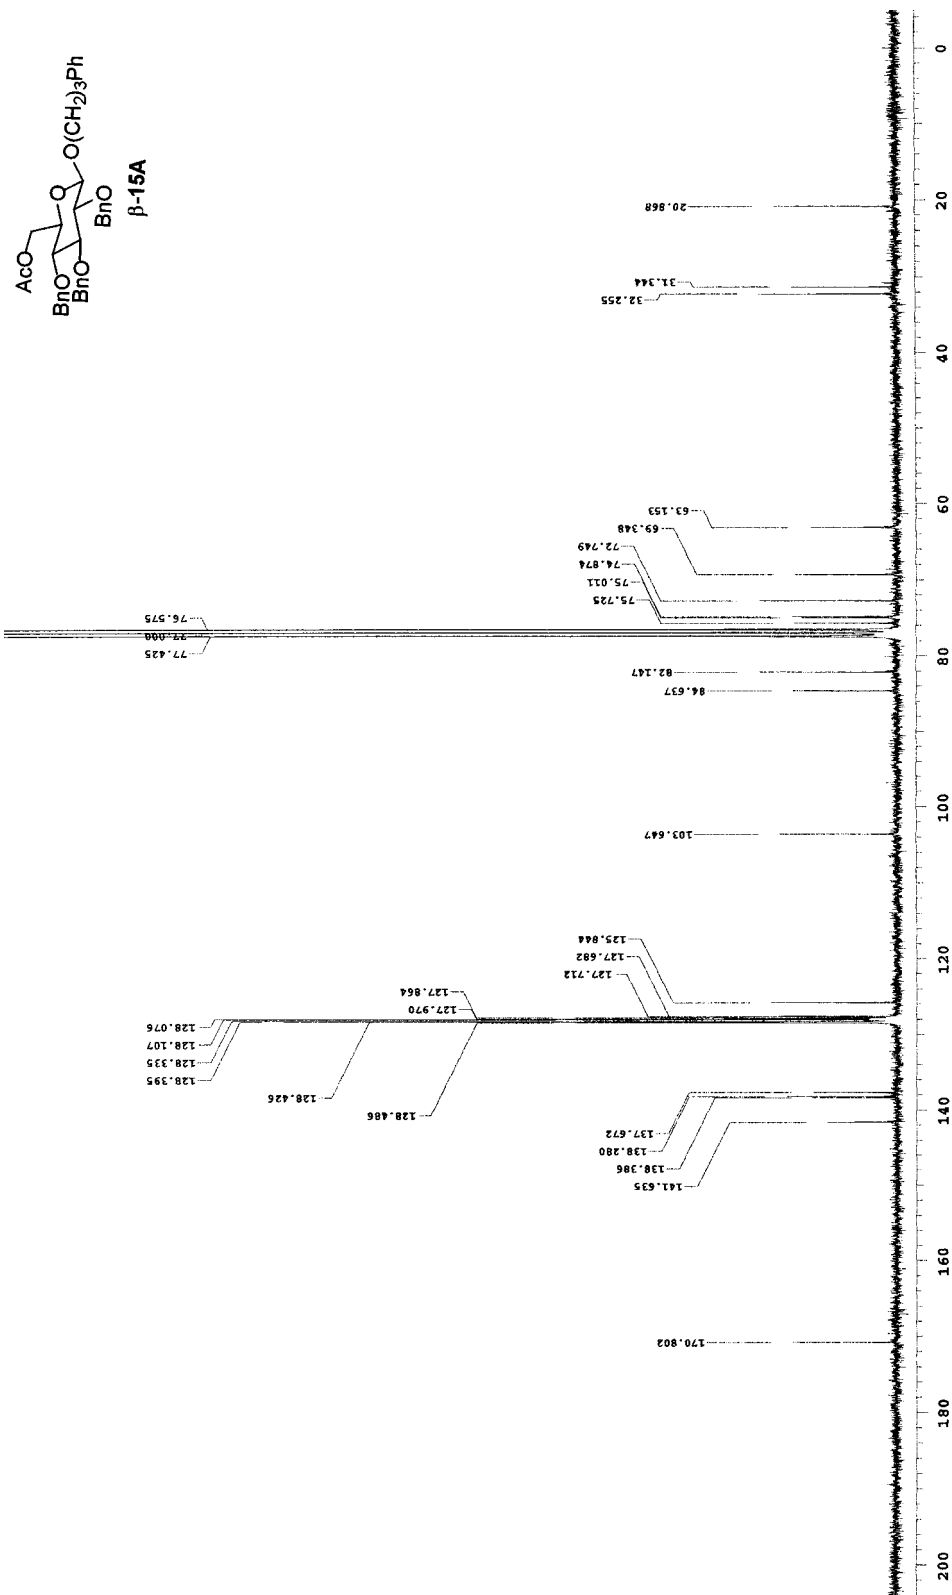

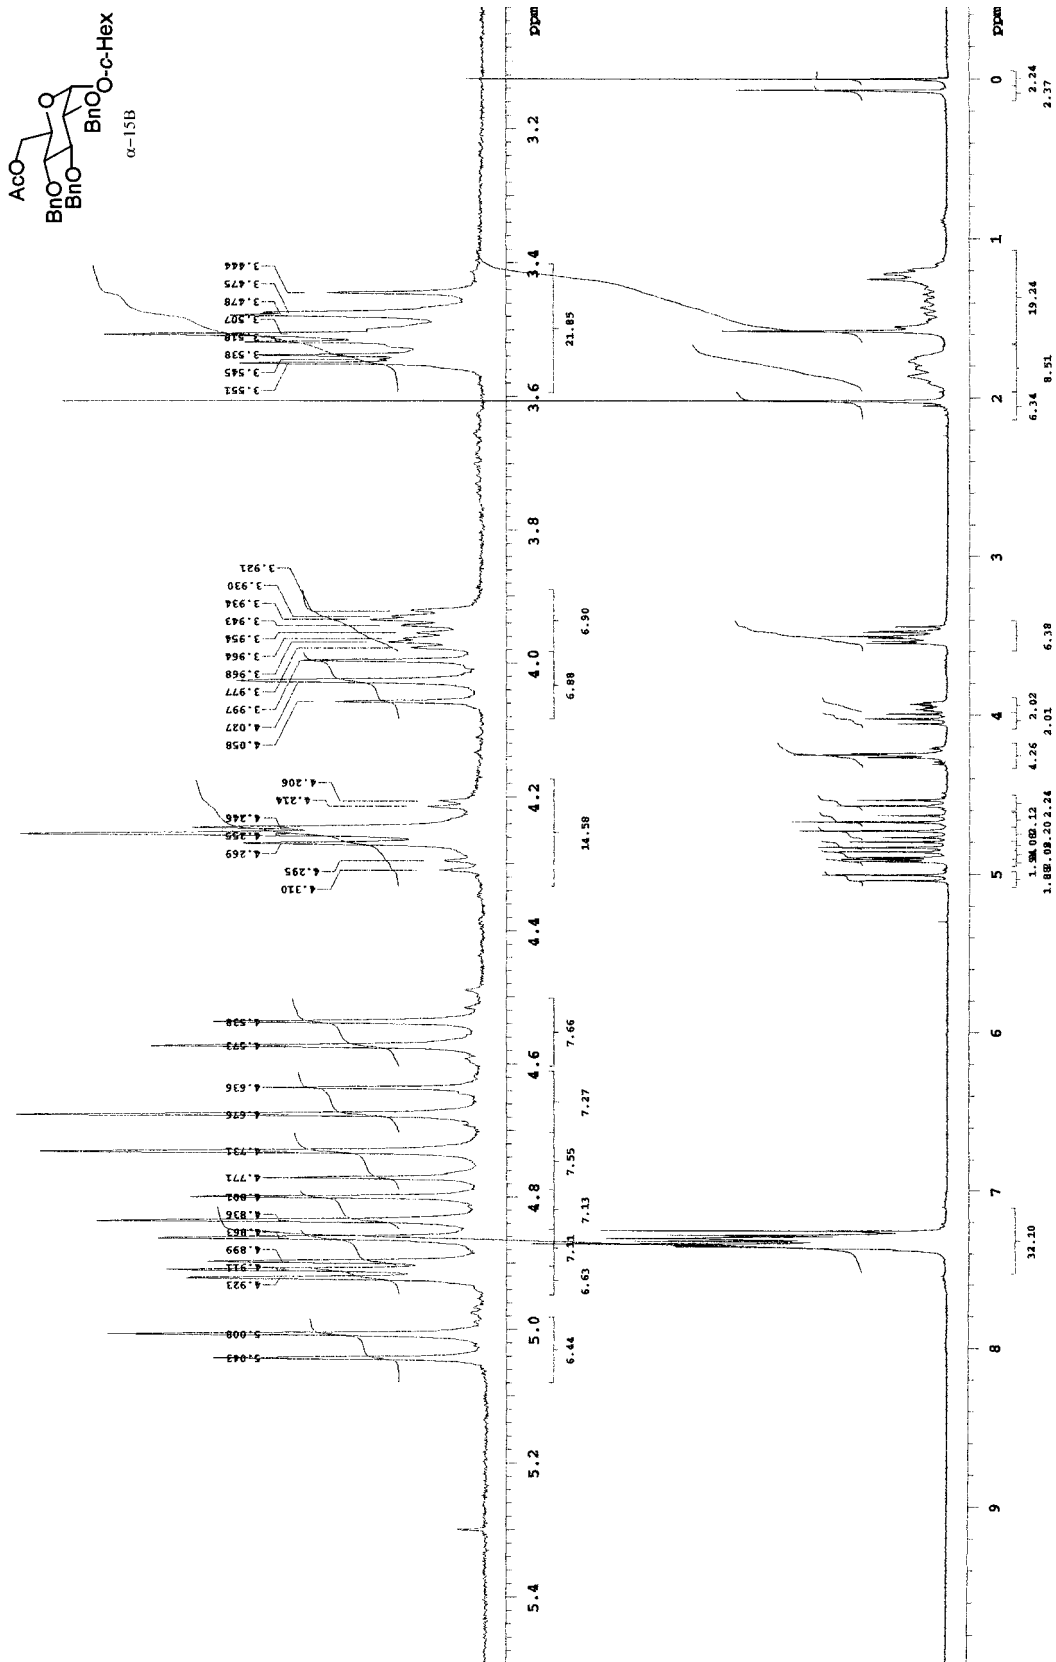

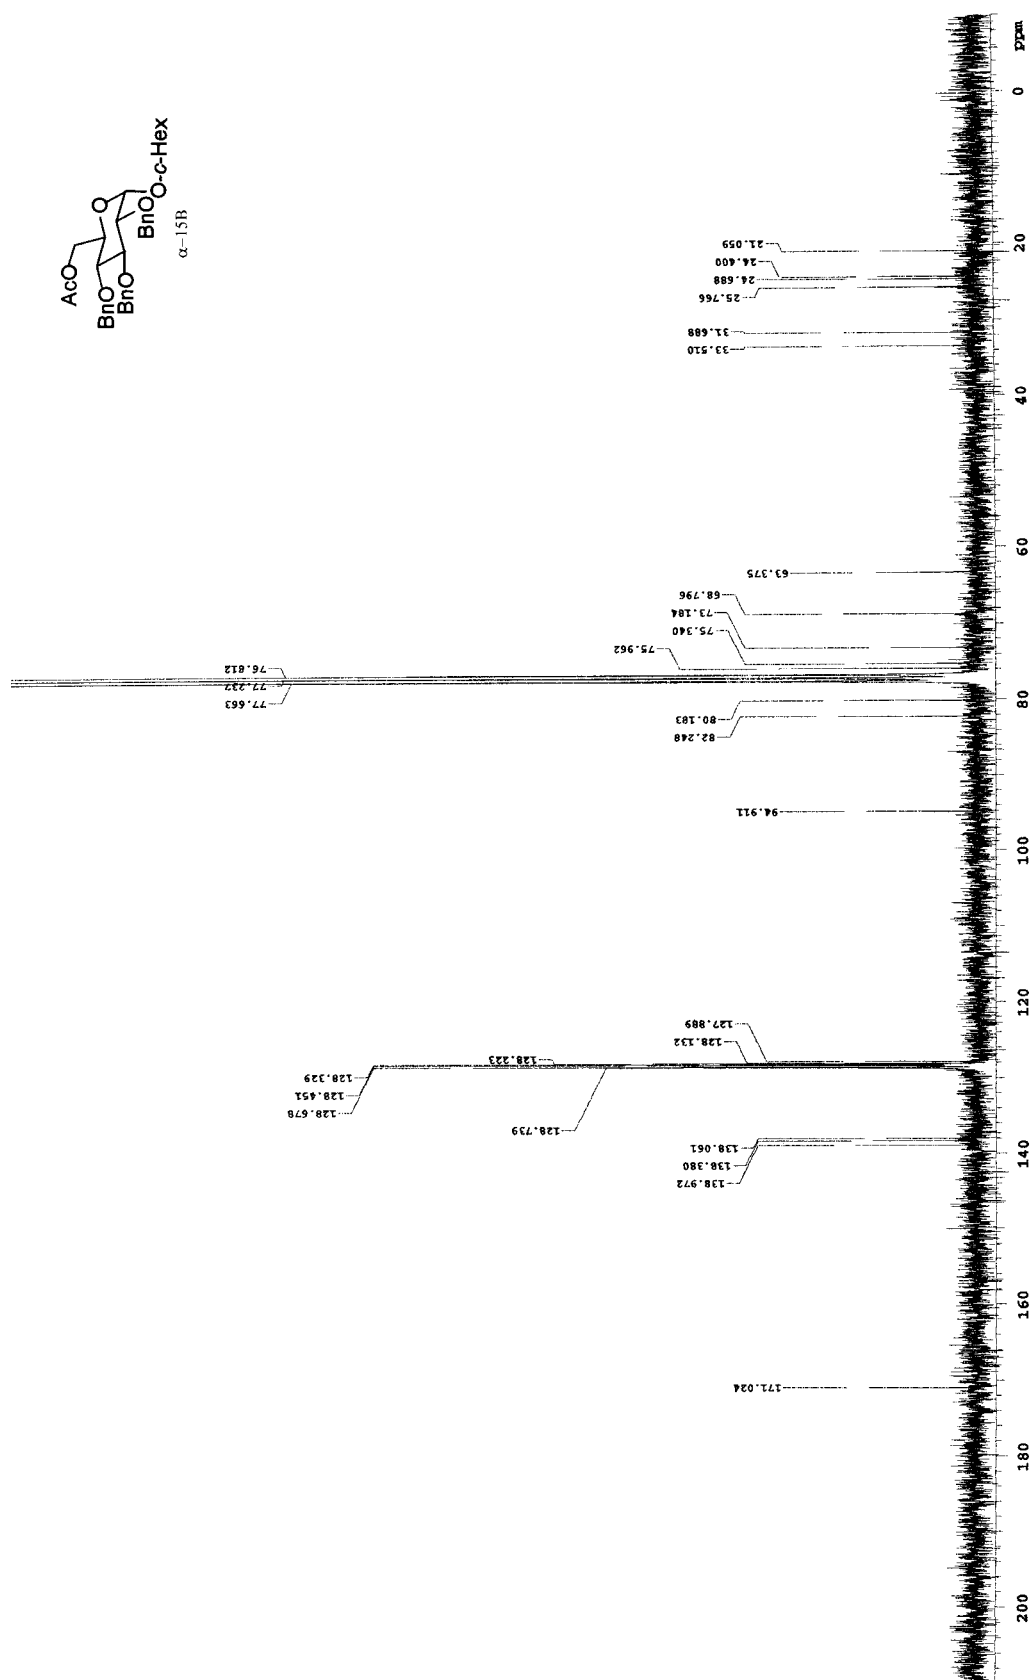

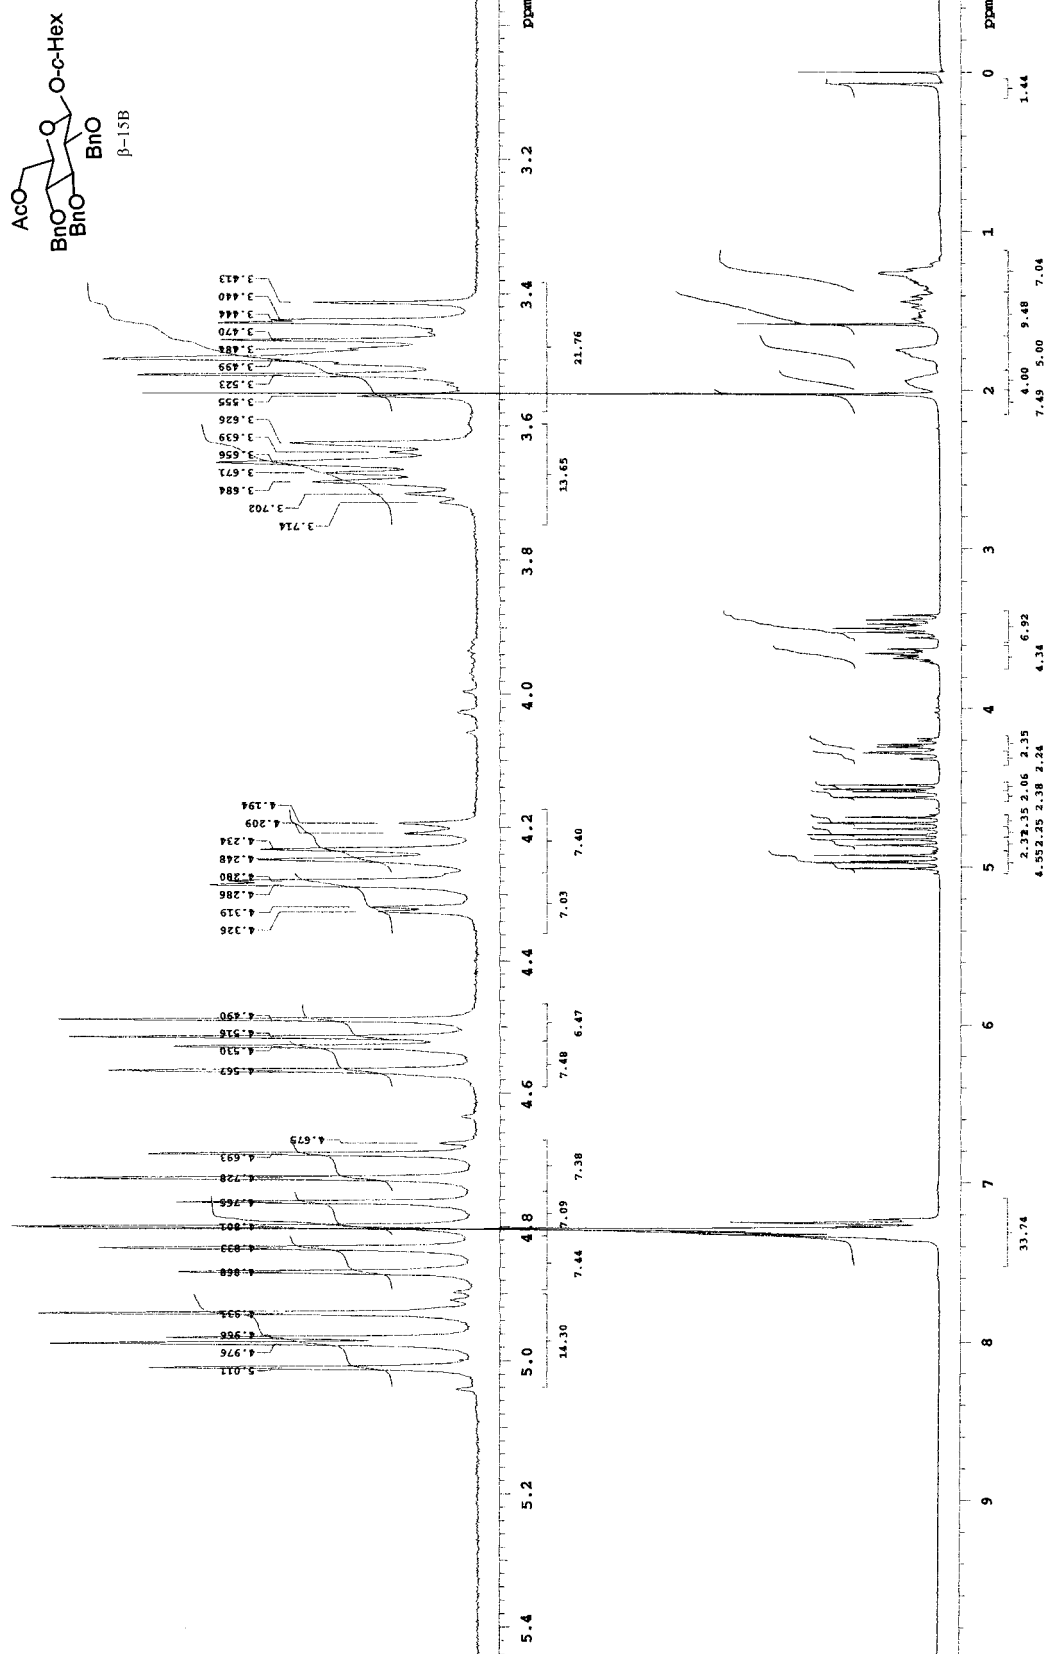

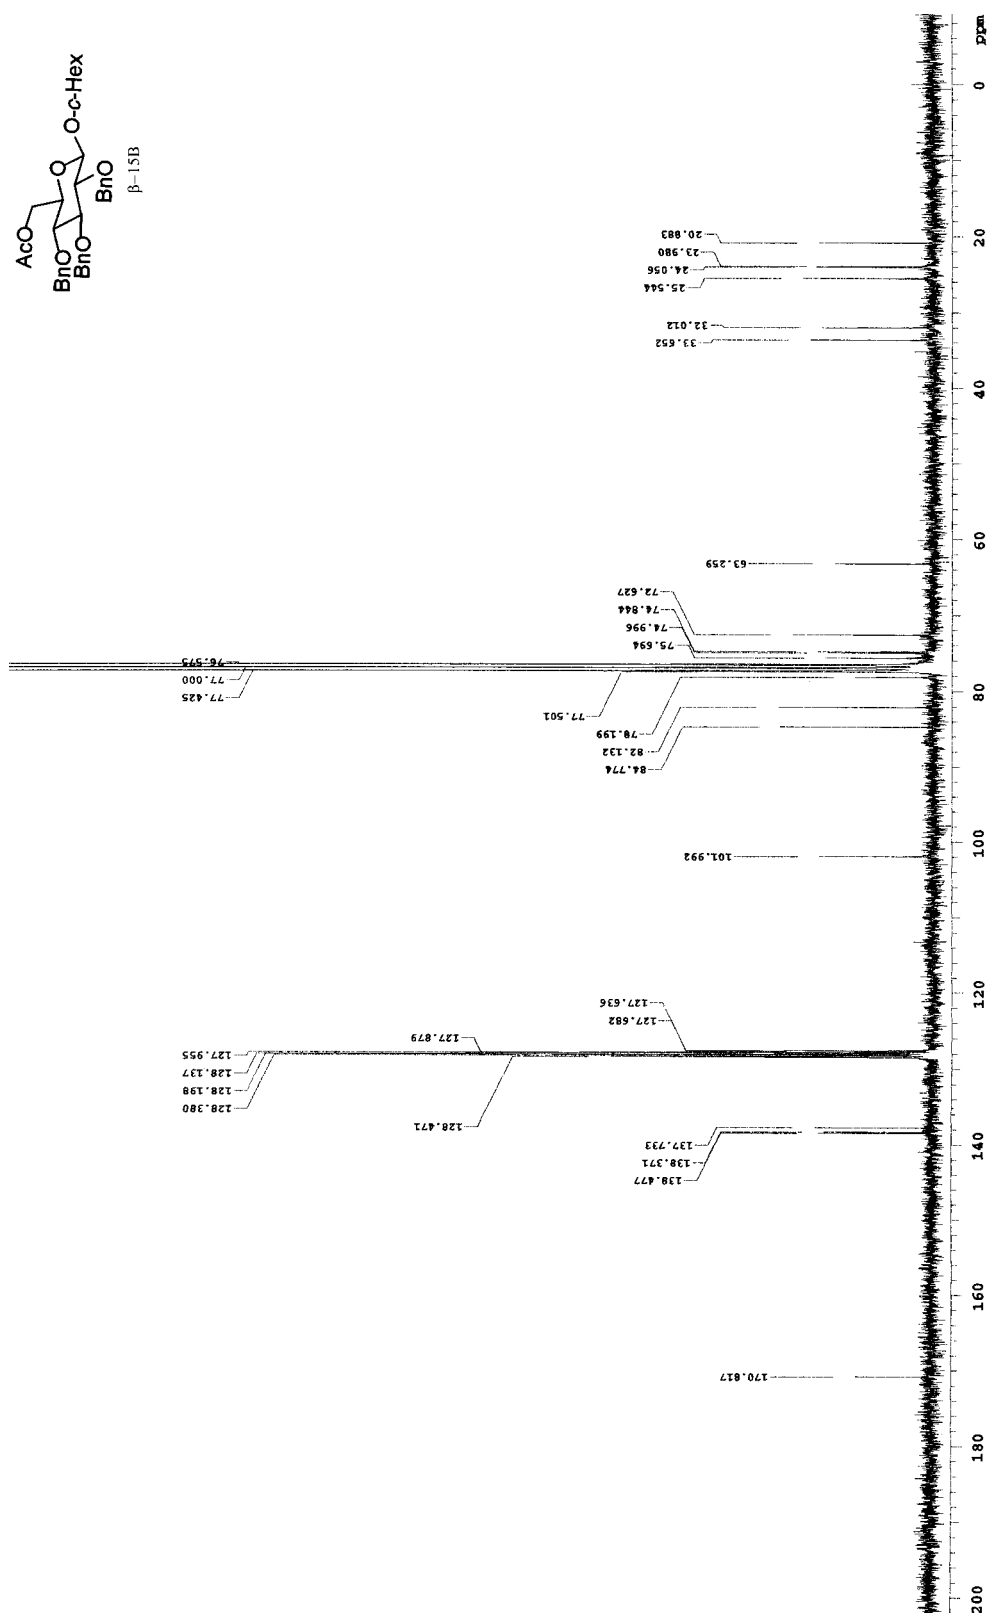



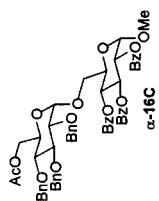

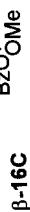

PW1 : 4.44 usec

```
OBFRQ : 399.65 MHZ
OBSET : 134870.00 HZ
```

IRBP2 : 6

```
CTEMP : 29.9 C
CSPEED : 10 Hz
```

RESOL : 0.18 HZ  
BE : 0.00 Hz

| Time | Temperature | Pressure | Flow Rate | Conversion |
|------|-------------|----------|-----------|------------|
| 0    | 25.00       | 1.00     | 1.00      | 0.00       |
| 10   | 25.00       | 1.00     | 1.00      | 0.00       |
| 20   | 25.00       | 1.00     | 1.00      | 0.00       |
| 30   | 25.00       | 1.00     | 1.00      | 0.00       |
| 40   | 25.00       | 1.00     | 1.00      | 0.00       |
| 50   | 25.00       | 1.00     | 1.00      | 0.00       |
| 60   | 25.00       | 1.00     | 1.00      | 0.00       |
| 70   | 25.00       | 1.00     | 1.00      | 0.00       |
| 80   | 25.00       | 1.00     | 1.00      | 0.00       |
| 90   | 25.00       | 1.00     | 1.00      | 0.00       |
| 100  | 25.00       | 1.00     | 1.00      | 0.00       |

|    |   |        |    |
|----|---|--------|----|
| XZ | : | 481.38 | Hz |
| XS | : | 481.38 | Hz |

operator

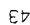

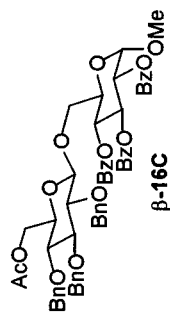

COMNT : SINGL  
 EXMOD : BCM  
 IRMOD : BCM  
 POINT : 32768  
 FREQU : 25000.00 Hz  
 SCANS : 12000  
 DUMY : 16  
 ACQTM : 1.3107 sec  
 PD : 1.2000 sec  
 RGAIN : 27  
 PW1 : 4.22 usec

OBNJC : 13C  
 OBFREQ : 100.40 MHz  
 OBSSET : 137395.00 Hz

IRNJC : 1H  
 IRFREQ : 399.65 MHz  
 IRSET : 134500.00 Hz  
 IRATN : 511  
 IRRPW : 50.0 usec  
 IRBP1 : 26  
 IRBP2 : 6  
 IRRNS : 0

ADBIT : 16  
 CTEMP : 30.0 C  
 CSPED : 10 Hz  
 SLVNT : CDCL3

RESOL : 0.76 Hz  
 BF : 0.38 Hz  
 T1 : 0.00 %  
 T2 : 0.00 %  
 T3 : 90.00 %  
 T4 : 100.00 %  
 REFVL : 0.00 ppm  
 XE : 20104.22 Hz  
 XS : 2257.16 Hz  
 operator

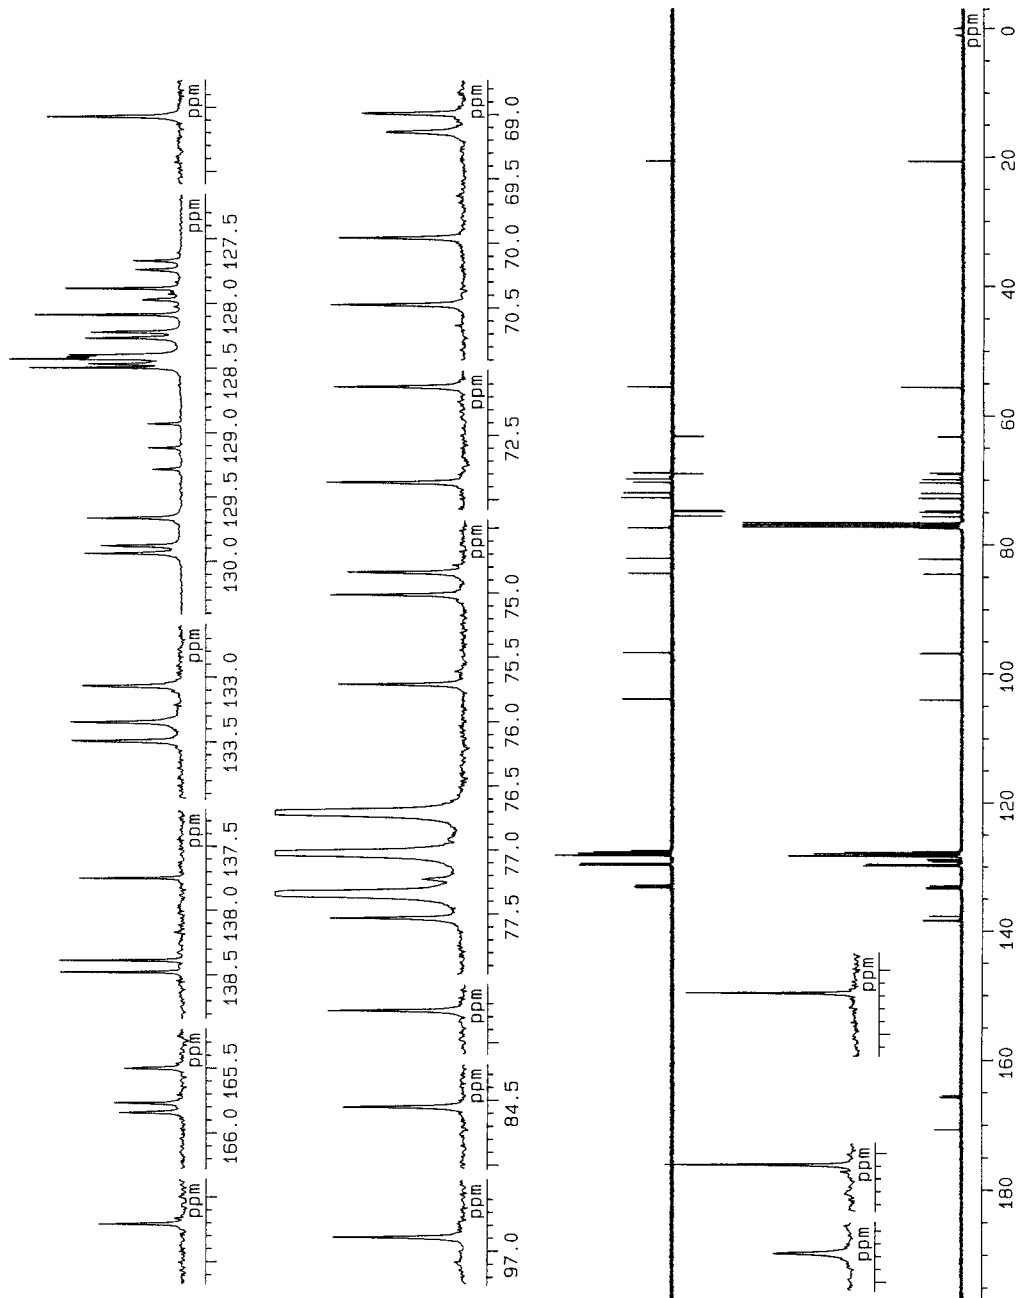

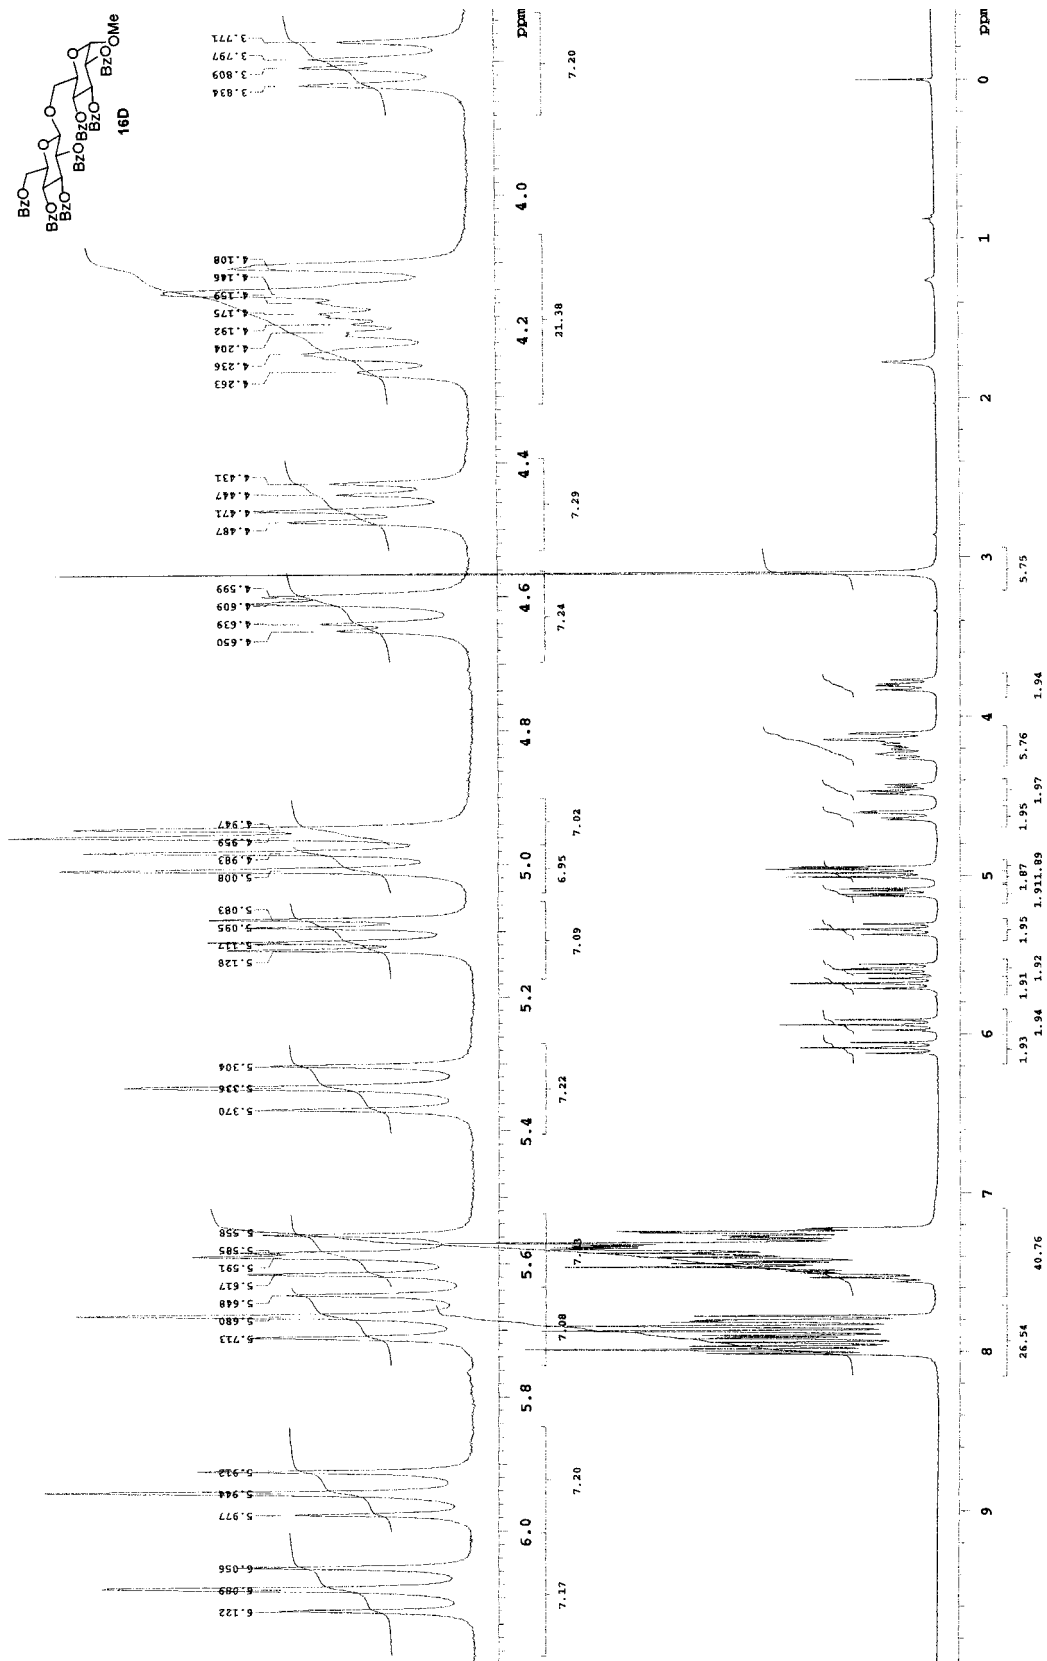

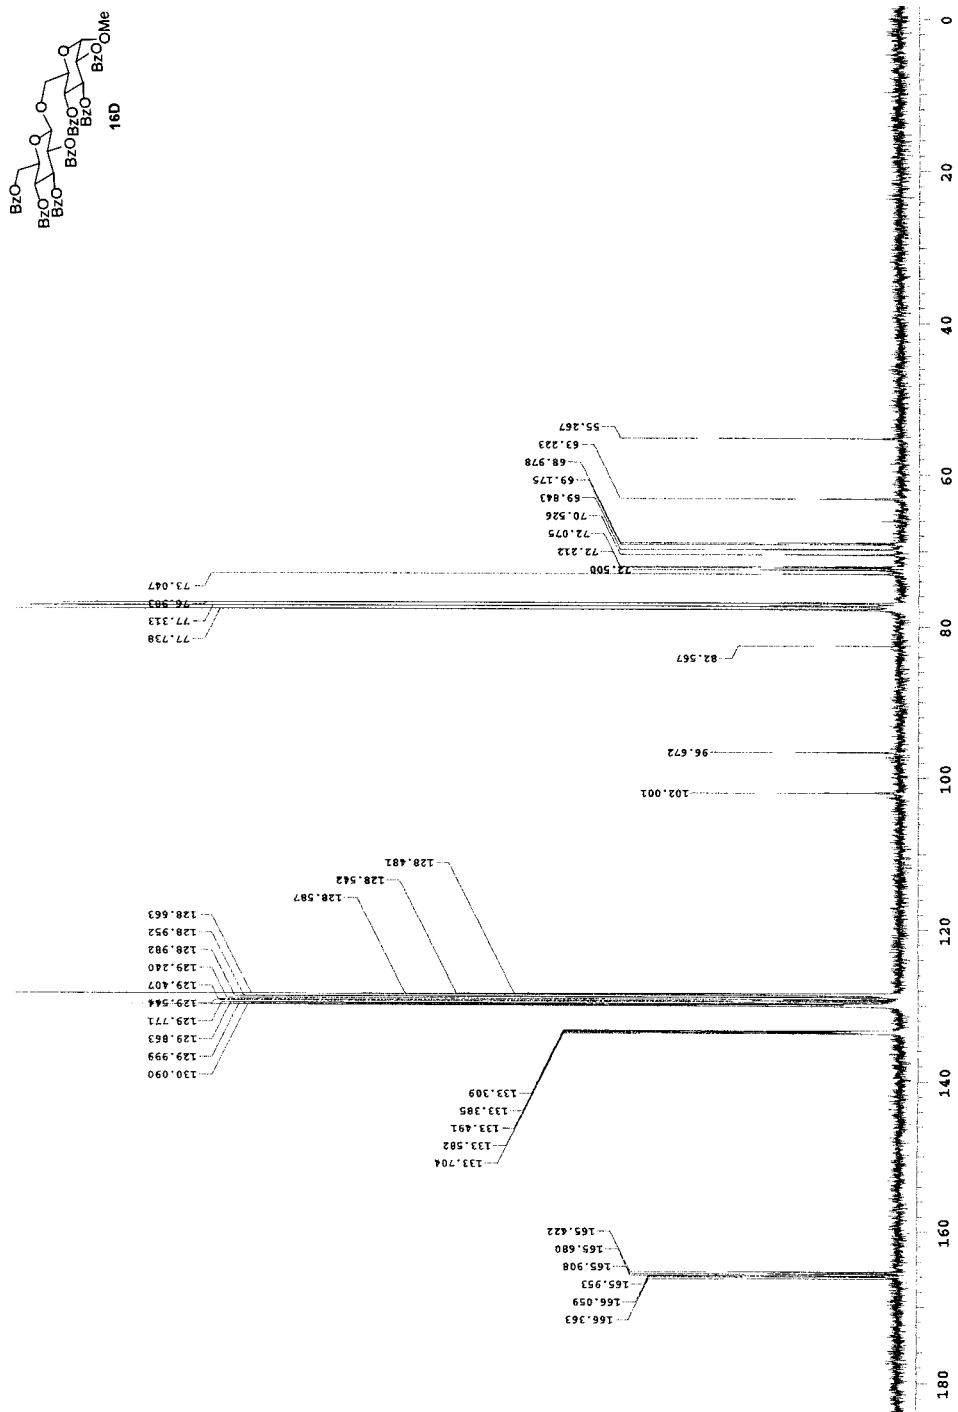

Supplement: Supplementary file 1 [file 5786301]
